# Supplementary material
Source: Research Square preprint supplement (doi:10.21203/rs.3.rs-8937254/v1)
Supplement: Supplementary file 1 [file 28e077339c8723a716fb98f4.xlsx]

## Sheet: Sheet1
content	post_publish_time	post_platform	user_name	user_age	user_influence	date	post_code	stkcd
我支持[可怜][口罩][笑哭][奸笑]	2022-06-30 15:36:05	东方财富Android版	e2180346537246822	1年	1	22826	65563	7
[坏笑][左哼哼][右哼哼][哈欠]加油	2022-06-30 13:21:15	东方财富Android版	h5696316543337866	11个月	0	22826	65564	7
$*ST全新(SZ000007)$退市全新！！！！全新退[哭][哭][哭]	2022-06-30 00:46:10	东方财富Android版	b2059376395285730	1.5年	6	22826	65565	7
全新好	2022-07-01 17:18:29	股吧网页版	t7062074907491466	6.3年	6	22827	65566	7
$全新好(SZ000007)$生死存亡，危在旦夕	2022-07-01 21:16:34	东方财富iPhone版	k6120054868242582	6.4年	3	22827	65567	7
以前主力洗盘拿货，你们出货，，，，，现在主力拉高出货，你们拿货，笑呵呵	2022-07-01 17:11:31	东方财富Android版	c2661085341548590	4.9年	4	22827	65568	7
以前不套人的时候，你说怕，现在涨了，你看着想买，就是套人的时候	2022-07-01 17:10:20	东方财富Android版	c2661085341548590	4.9年	4	22827	65569	7
没来的急上车，谁给我叨叨说出货的？？盘整那么久，哪里有货可出？害得我没上车，错过	2022-07-01 15:06:24	东方财富Android版	g3041315831679850	3.3年	5	22827	65570	7
全新好盘中最高7.9元，股价创近一年新高	2022-07-01 16:08:17	股吧网页版	p2369125312925066	5年	9	22827	65571	7
$全新好(SZ000007)$资金流出那么多，还是涨的，谁能解释一下吗	2022-07-01 15:28:46	东方财富Android版	g3236386086208350	2.5年	4	22827	65573	7
放量上涨还会上涨	2022-07-01 15:07:26	东方财富Android版	g3041315831679850	3.3年	5	22827	65574	7
看到评论就别已深套	2022-07-01 13:49:42	东方财富Android版	q7046306544390962	11个月	1	22827	65575	7
现在的摘帽就是套人	2022-07-01 13:43:51	东方财富Android版	q7046306544390962	11个月	1	22827	65576	7
这是散户支撑起来的吗？	2022-07-01 11:42:13	东方财富Android版	g5595386476003832	1.2年	3	22827	65577	7
$全新好(SZ000007)$今天是007解冻的好日子！…这里的神仙好打架…我等	2022-07-01 13:35:26	东方财富Android版	f9461145283493554	5年	4	22827	65578	7
$全新好(000007)$曾经3块多买过3块多卖了好几万股。。。当时叫全新好。。	2022-07-01 13:27:24	东方财富Android版	jaylan	13.9年	8	22827	65579	7
$全新好(SZ000007)$喜提涨速榜，故意这么拉就是用中午一个半小时就是来吸	2022-07-01 11:33:21	东方财富Android版	r9500356137872586	2.3年	5	22827	65580	7
被玩坏了吧	2022-07-01 11:34:52	东方财富iPhone版	a1452326182128464	2.2年	0	22827	65581	7
$全新好(SZ000007)$其实感觉不停涨更好，不然人气一上来人就翻倍了	2022-07-01 11:17:04	东方财富Android版	l4577315983181214	2.8年	6	22827	65582	7
抄底了	2022-07-01 10:28:25	东方财富Android版	g3041315831679850	3.3年	5	22827	65583	7
散了散了散了都散了[大笑]	2022-07-01 10:39:56	股吧网页版	i9154396009259924	2.7年	3	22827	65584	7
很好[傲]	2022-07-01 10:38:18	东方财富Android版	h6718316555522252	11个月	0	22827	65585	7
拙劣的操盘手法导致的，一手好牌打这么烂	2022-07-01 10:22:16	股吧网页版	i9154396009259924	2.7年	3	22827	65586	7
7.66成功跑路	2022-07-01 09:43:52	东方财富Android版	p9175145413194582	4.6年	3	22827	65587	7
今天长阴之后又要回调+盘整很久了	2022-07-01 09:50:13	股吧网页版	ghz2013	10.2年	7	22827	65588	7
今天可以买了，板块拖累了，明天开始一字板	2022-07-01 10:05:45	东方财富Android版	g3041315831679850	3.3年	5	22827	65589	7
我是日，站岗	2022-07-01 10:28:43	东方财富Android版	g5595386476003832	1.2年	3	22827	65590	7
全新好全新妙，全新全新哌哌叫[大笑][大笑][大笑]	2022-07-01 10:23:54	东方财富iPhone版	x5677316357490152	1.6年	4	22827	65591	7
$全新好(SZ000007)$我抛啦，你可以涨了，	2022-07-01 09:55:29	东方财富Android版	g3236386086208350	2.5年	4	22827	65592	7
直接走人	2022-07-01 09:22:09	东方财富Android版	b4849306408286718	1.4年	7	22827	65593	7
直接清仓仓o	2022-07-01 09:21:26	东方财富Android版	b4849306408286718	1.4年	7	22827	65594	7
高开直接清仓	2022-07-01 09:21:09	东方财富Android版	b4849306408286718	1.4年	7	22827	65595	7
$全新好(SZ000007)$牛逼啊，我说自选股怎么有个全新好，原来摘帽了，恭喜	2022-07-01 09:19:16	东方财富Android版	j6053226292929926	1.8年	4	22827	65596	7
$全新好(SZ000007)$这股吧真安静	2022-07-03 08:59:45	东方财富iPhone版	m5654094275553424	8.3年	4	22829	65597	7
007老友们，俺又回来叭啦叭啦了	2022-07-03 09:30:51	股吧网页版	m9257094760726130	6.7年	6	22829	65598	7
你摘帽比华塑强点，不错了	2022-07-04 15:11:06	东方财富Android版	g1864376213102086	2.1年	5	22830	65599	7
7.7全跑了	2022-07-04 13:47:24	东方财富Android版	b2559355511527202	4.3年	4	22830	65600	7
$全新好(SZ000007)$太差劲了	2022-07-04 14:57:39	东方财富Android版	r1892326145830600	2.3年	6	22830	65601	7
一箩筐利好，好了个寂寞	2022-07-04 14:47:43	股吧网页版	i9154396009259924	2.7年	3	22830	65602	7
刚才那一波拉升就应该走了，这股暂时不会大涨，今天可能冲高回落下补缺口	2022-07-04 10:06:23	股吧网页版	m1000094453652018	7.7年	6	22830	65603	7
很好[惊讶][囧][主力][梭哈]	2022-07-04 11:03:32	东方财富Android版	e2911306561606546	11个月	0	22830	65604	7
还好[晕][微笑][大笑][鼓掌]	2022-07-04 11:03:30	东方财富Android版	g3235356561616200	11个月	0	22830	65605	7
好啊[大哭][呲牙][再见][委屈]	2022-07-04 10:46:26	东方财富Android版	s6730366555516438	11个月	0	22830	65606	7
主升浪开启，锁仓吃肉[上涨][上涨][上涨]	2022-07-04 10:11:19	东方财富iPhone版	b8091306164711958	2.2年	2	22830	65607	7
[鼓掌][鼓掌][鼓掌][大笑]一手好牌，打这么烂，前面作茧自缚，自废武功，最弱	2022-07-05 21:33:34	股吧网页版	i9154396009259924	2.7年	3	22831	65608	7
$全新好(SZ000007)$废物狗庄	2022-07-05 14:36:56	东方财富Android版	g3236386086208350	2.5年	4	22831	65609	7
乌云盖顶	2022-07-05 14:35:19	股吧网页版	i9154396009259924	2.7年	3	22831	65610	7
$全新好(SZ000007)$废物	2022-07-05 13:47:56	东方财富Android版	g3236386086208350	2.5年	4	22831	65611	7
看看一起脱帽的其他两个	2022-07-05 13:24:05	股吧网页版	q4067326265163502	1.9年	4	22831	65612	7
520啥意思	2022-07-05 11:26:55	东方财富Android版	n5727365849168970	3.2年	1	22831	65613	7
转发	2022-07-05 07:28:56	东方财富iPhone版	a7895346428160954	1.4年	0	22831	65614	7
$全新好(SZ000007)$这个庄到底在玩什么，每天莫名其妙的。	2022-07-06 11:08:05	东方财富Android版	g3236386086208350	2.5年	4	22832	65615	7
又摘帽啦	2022-07-06 12:33:32	东方财富Android版	h2287305960309730	2.9年	6	22832	65616	7
[惊讶][囧][抓狂][偷笑]是	2022-07-06 19:36:40	东方财富Android版	r4058376531252118	1年	0	22832	65617	7
$全新好(SZ000007)$明天不涨停也是大阳线	2022-07-06 15:26:41	东方财富Android版	c2661085341548590	4.9年	4	22832	65618	7
777	2022-07-06 14:36:41	东方财富Android版	i4649135463981162	4.5年	4	22832	65619	7
$全新好(SZ000007)$今天上8	2022-07-08 05:43:43	东方财富Android版	i4649135463981162	4.5年	4	22834	65620	7
$全新好(SZ000007)$这庄是美术系的吧，每天在那边画图	2022-07-08 15:18:12	东方财富Android版	n2727316371359254	1.5年	4	22834	65621	7
还好[献花]	2022-07-08 10:46:10	东方财富Android版	e4085336531260608	1年	0	22834	65622	7
这应该是庄股吧	2022-07-09 20:29:27	东方财富iPhone版	p3845215639747042	3.9年	3	22835	65623	7
这60分钟图比牛顿还画的好	2022-07-11 18:49:04	东方财富iPhone版	m5310376025982686	2.7年	5	22837	65624	7
啥时候能牛气一把啊，看你这怂样	2022-07-11 14:43:03	东方财富Android版	m7691094259622520	8.3年	4	22837	65625	7
这几天应该有个跌停	2022-07-11 15:39:37	东方财富Android版	c2661085341548590	4.9年	4	22837	65626	7
空仓看戏	2022-07-12 23:02:09	东方财富Android版	c2661085341548590	4.9年	4	22838	65627	7
里面都是小庄，谁也不想来抬轿，除非再来一个之前和那个融通富国一样实力的庄	2022-07-12 21:32:39	东方财富Android版	c2661085341548590	4.9年	4	22838	65628	7
那个富时基金是不是跑了	2022-07-12 16:32:12	东方财富Android版	c2661085341548590	4.9年	4	22838	65629	7
跌停估计快了	2022-07-12 14:54:27	东方财富Android版	c2661085341548590	4.9年	4	22838	65630	7
全新好盘中最高7.94元，股价创近一年新高	2022-07-13 15:44:10	股吧网页版	p2369125312925066	5年	9	22839	65631	7
图形不孬	2022-07-13 19:10:21	东方财富Android版	h2150375507635258	4.3年	5	22839	65632	7
好帖	2022-07-13 15:39:02	东方财富Android版	g6216356555455862	11个月	0	22839	65633	7
这个股是在玩蛇皮么，天天这么横着。。。	2022-07-13 11:26:13	股吧网页版	y4004336233806280	2年	4	22839	65634	7
5000手压盘，生怕别人拉起来	2022-07-13 09:52:42	东方财富Android版	g3236386086208350	2.5年	4	22839	65635	7
明天冲八元	2022-07-14 22:53:16	东方财富iPhone版	m5579005501288374	4.3年	6	22840	65636	7
全新好：预计22年半年度归母净利润为-1150万元至-850万元	2022-07-14 16:42:41	股吧网页版	g2368125312925060	5年	9	22840	65637	7
全新好盘中最高7.96元，股价连续两日创近一年新高	2022-07-14 15:48:38	股吧网页版	p2369125312925066	5年	9	22840	65638	7
喜提跌停板	2022-07-14 18:18:58	东方财富Android版	c2661085341548590	4.9年	4	22840	65639	7
喂，睡着了，还当ST啊，	2022-07-14 10:18:44	股吧网页版	i9154396009259924	2.7年	3	22840	65640	7
这点亏损不至于跌停吧	2022-07-14 21:17:22	东方财富Android版	g3236386086208350	2.5年	4	22840	65641	7
明天直接砸跌停板了	2022-07-14 16:44:38	东方财富Android版	m6886094377214932	8年	7	22840	65642	7
漂亮	2022-07-14 11:24:10	东方财富Android版	h2150375507635258	4.3年	5	22840	65643	7
168一起发，可惜可惜	2022-07-14 09:58:29	东方财富Android版	c2661085341548590	4.9年	4	22840	65644	7
保持这个角度上涨，非常香。	2022-07-14 08:13:48	东方财富Android版	h2150375507635258	4.3年	5	22840	65645	7
我有60万的理财资金到账了，只要跌了，我就买	2022-07-15 11:19:08	东方财富Android版	c2661085341548590	4.9年	4	22841	65646	7
涨停	2022-07-15 08:05:18	东方财富Android版	h2150375507635258	4.3年	5	22841	65647	7
快点砸啊，老铁	2022-07-15 09:42:57	股吧网页版	y4004336233806280	2年	4	22841	65648	7
我就回来看看	2022-07-15 14:43:15	股吧网页版	i9154396009259924	2.7年	3	22841	65649	7
现在也不跌，不敢买啊，等跌	2022-07-15 11:19:36	东方财富Android版	c2661085341548590	4.9年	4	22841	65650	7
今天竞价能看出跌还是涨不	2022-07-15 09:18:32	东方财富Android版	g3236386086208350	2.5年	4	22841	65651	7
转发	2022-07-17 20:58:14	东方财富Android版	o2485366533808214	1年	1	22843	65652	7
这票随时成杀猪盘！	2022-07-18 23:35:25	东方财富电脑版	m2960094355037376	8年	4	22844	65653	7
看你横行能几时？	2022-07-18 18:10:13	东方财富Android版	g5228306177714164	2.2年	2	22844	65654	7
别演了，不突破诱不到大量接盘	2022-07-18 13:34:24	东方财富电脑版	d3930316190655150	2.1年	4	22844	65655	7
自从摘了所谓的绿帽子！每天整得都不如个ST股了你！	2022-07-18 14:24:54	东方财富Android版	f9461145283493554	5年	4	22844	65656	7
拉萨帮五路大军集合，发起冲锋！跌停价抄底	2022-07-18 13:11:01	股吧网页版	d3930316190655150	2.1年	4	22844	65657	7
板块垫底	2022-07-18 11:16:13	东方财富Android版	g3236386086208350	2.5年	4	22844	65658	7
这股分时和心电图一样	2022-07-18 11:08:11	东方财富Android版	a8420325558361992	4.2年	2	22844	65659	7
憋了这么长时间今天应该冲8块了吧[666]	2022-07-18 09:36:39	东方财富Android版	d2001376262465626	1.9年	4	22844	65660	7
天天玩泥巴呢	2022-07-18 10:05:58	东方财富Android版	g3236386086208350	2.5年	4	22844	65661	7
早上卖，下午接，尾盘拉	2022-07-19 13:50:31	东方财富Android版	i3098325589364754	4.1年	2	22845	65662	7
好帖	2022-07-19 18:53:35	东方财富Android版	m5151094426290174	7.8年	0	22845	65663	7
近期有大跌	2022-07-19 18:37:15	东方财富Android版	c2661085341548590	4.9年	4	22845	65664	7
出货太多，诱多接盘	2022-07-19 18:37:01	东方财富Android版	c2661085341548590	4.9年	4	22845	65665	7
好帖子	2022-07-19 16:47:51	东方财富Android版	d4045386579650798	10个月	0	22845	65666	7
全新好盘中最高7.99元，股价连续五日创近一年新高	2022-07-19 15:45:48	股吧网页版	p2369125312925066	5年	9	22845	65667	7
股价摇摇欲坠的样子，这两天每天都流出几千万，是打算要撤了吗？要撤也要佯攻到8以上	2022-07-19 11:18:08	东方财富iPhone版	m5579005501288374	4.3年	6	22845	65669	7
明天必定要删自选，，太了，，，受不了，天天上亿的成交量织布	2022-07-19 10:51:18	东方财富iPhone版	b4713346147621814	2.3年	4	22845	65670	7
洗洗更健康，随时准备突破上升了，加油	2022-07-19 09:59:29	东方财富Android版	i9131376377367106	1.5年	4	22845	65671	7
出货太多，近期有大跌	2022-07-20 11:51:27	东方财富Android版	c2661085341548590	4.9年	4	22846	65672	7
深蹲，还差点意思。	2022-07-20 19:13:38	东方财富Android版	h2150375507635258	4.3年	5	22846	65673	7
今天砸的有点狠啊880800	2022-07-20 14:33:03	东方财富iPhone版	d3318196179435612	2.2年	2	22846	65674	7
880手太坏了	2022-07-20 14:29:11	东方财富Android版	p3168346425820546	1.4年	3	22846	65675	7
庄股	2022-07-20 16:14:32	东方财富Android版	d2059155834131240	3.3年	5	22846	65676	7
出货这么多，谁在接盘	2022-07-20 14:44:35	东方财富Android版	g3236386086208350	2.5年	4	22846	65677	7
人要用用两年学会说话，用一生学会闭嘴	2022-07-20 10:36:13	股吧网页版	i9154396009259924	2.7年	3	22846	65678	7
你要不大跌，天理不容！	2022-07-20 10:30:08	东方财富Android版	y6772395963704458	2.9年	4	22846	65679	7
出局了，留了100股做纪念	2022-07-20 11:05:38	东方财富iPhone版	m5579005501288374	4.3年	6	22846	65680	7
这吧的人都特别聪明！都知道会大跌	2022-07-20 10:45:14	东方财富Android版	f9461145283493554	5年	4	22846	65681	7
摘星摘帽后，一个涨停都没有，在玩什么	2022-07-20 11:20:56	东方财富Android版	g3236386086208350	2.5年	4	22846	65682	7
再来一根阴线才漂亮	2022-07-21 09:32:55	股吧网页版	ghz2013	10.2年	7	22847	65683	7
jieet	2022-07-21 14:04:29	东方财富iPhone版	x3089326340232952	1.6年	4	22847	65684	7
你大爷，跌的没完没了啦	2022-07-21 13:38:50	东方财富Android版	g3236386086208350	2.5年	4	22847	65685	7
好帖子	2022-07-21 19:47:51	东方财富Android版	k9880386573498002	10个月	0	22847	65686	7
来点，拿着当砖头用，	2022-07-21 14:38:46	股吧网页版	i9154396009259924	2.7年	3	22847	65687	7
来点，拿着当砖头用，直到没有声音为止[大笑]	2022-07-21 14:36:41	股吧网页版	i9154396009259924	2.7年	3	22847	65688	7
880，加油，看好你	2022-07-21 09:54:05	股吧网页版	y4004336233806280	2年	4	22847	65689	7
好帖子	2022-07-21 03:37:32	东方财富Android版	j4818376579689552	10个月	0	22847	65690	7
3天跌了这么多，感觉快到底了，下周应该进入反弹。	2022-07-22 22:58:04	东方财富Android版	i6887336445009622	1.3年	2	22848	65691	7
5,10,20.30,60，全部破位，周线，月线即将死叉共振[[呲牙]	2022-07-22 15:21:55	股吧网页版	i9154396009259924	2.7年	3	22848	65693	7
垃圾	2022-07-22 14:49:44	东方财富Android版	p9175145413194582	4.6年	3	22848	65694	7
垃圾	2022-07-22 14:21:25	东方财富Android版	h2150375507635258	4.3年	5	22848	65695	7
做个人吧	2022-07-22 11:22:55	东方财富Android版	g3236386086208350	2.5年	4	22848	65696	7
小庄的出货价位是6.5元至7元这个价位，千万别傻傻的去接盘。	2022-07-22 09:40:48	东方财富Android版	m6886094377214932	8年	7	22848	65697	7
庄股！！！！小心怎么死都不知道	2022-07-22 08:59:19	东方财富Android版	k5740605232469924	5.2年	5	22848	65698	7
这是庄股，各位知道吗。之前已经断头闸一次了哦，看看最近庄股苏州龙杰	2022-07-22 08:57:02	东方财富Android版	k5740605232469924	5.2年	5	22848	65699	7
行业板块连涨好几天了	2022-07-22 10:41:19	东方财富Android版	p3168346425820546	1.4年	3	22848	65700	7
就你这种跌法还想瞎走我啦？	2022-07-22 10:27:24	东方财富iPhone版	v6958356146761848	2.3年	4	22848	65701	7
飞刀流，谁进埋谁	2022-07-22 09:44:58	股吧网页版	y4004336233806280	2年	4	22848	65703	7
咋成了广告股吧了	2022-07-22 08:51:29	东方财富Android版	p3168346425820546	1.4年	3	22848	65704	7
好帖转发好帖转发	2022-07-22 06:39:26	东方财富Android版	s6557366555475722	11个月	0	22848	65705	7
#宁德时代回应锂回收质疑#	2022-07-23 10:56:38	东方财富iPhone版	j5403316226195014	2年	2	22849	65706	7
和预期一样7元开始企稳，给散户一种假象企稳了，下面就是横盘出货了。	2022-07-25 18:16:19	东方财富Android版	m6886094377214932	8年	7	22851	65707	7
等跌停抄底，现在还是半山腰	2022-07-25 17:18:09	东方财富Android版	c2661085341548590	4.9年	4	22851	65708	7
7.98进的还有和我一起的吗？	2022-07-25 11:42:40	东方财富Android版	c3277356322346066	1.7年	1	22851	65709	7
我是看啊代码007进来的，图个开心	2022-07-25 13:23:01	东方财富Android版	n2527385525401814	4.3年	6	22851	65710	7
阴跌不止	2022-07-25 11:23:12	东方财富Android版	i4649135463981162	4.5年	4	22851	65711	7
这样跌，裤衩子都亏没啦	2022-07-25 10:19:30	东方财富Android版	g3236386086208350	2.5年	4	22851	65712	7
走了	2022-07-25 10:53:36	东方财富Android版	z2828356225564014	2年	4	22851	65713	7
这只股票技术指标已经走坏了，涨上涨至少需要两个星期后的修复。短期内下方会回踩到5	2022-07-25 09:50:23	东方财富Android版	w8426084969941706	6.1年	6	22851	65714	7
！！！！！！	2022-07-25 10:10:51	东方财富Android版	p9175145413194582	4.6年	3	22851	65715	7
了	2022-07-25 10:09:58	东方财富Android版	p9175145413194582	4.6年	3	22851	65716	7
升就升一点点，跌就跌这么多，放量下跌还要跌[哭]，被这个股害惨了	2022-07-25 09:51:51	东方财富iPhone版	t3835346399694930	1.5年	1	22851	65717	7
明天大概率下跌	2022-07-26 19:08:31	东方财富Android版	c2661085341548590	4.9年	4	22852	65718	7
明显主力机构又跑步进场了	2022-07-26 15:07:23	东方财富Android版	i9131376377367106	1.5年	4	22852	65719	7
缩量反抽，诱多	2022-07-26 15:02:07	东方财富Android版	c2661085341548590	4.9年	4	22852	65720	7
哈哈哈，我跑了，赚200块，吃个饭，谢谢老板	2022-07-26 11:13:54	东方财富Android版	k6922335628631626	3.9年	6	22852	65721	7
我走了你就涨了，有点太不近人情	2022-07-26 11:12:18	东方财富Android版	z2828356225564014	2年	4	22852	65722	7
散户赶紧进场接盘，别不识抬举，砸了12%了，就等散户进场了，赶紧的。哈哈哈	2022-07-26 11:09:49	东方财富Android版	m6886094377214932	8年	7	22852	65723	7
板块都跑不过的	2022-07-26 10:40:19	股吧Android版	i3098325589364754	4.1年	2	22852	65724	7
资金开始入场了	2022-07-26 10:12:26	东方财富Android版	f8068356152936992	2.3年	3	22852	65725	7
这个股票不行啊，板块这么牛，这个股票这么邋遢	2022-07-26 10:06:27	东方财富Android版	k6922335628631626	3.9年	6	22852	65726	7
割了也没涨，明天再跌接回来 变相降低成本	2022-07-27 15:02:05	股吧网页版	c4674355674760780	3.8年	4	22853	65727	7
明天高开记得出，赚个差价还是可以的	2022-07-27 14:49:52	东方财富Android版	v2761316541603276	1年	3	22853	65728	7
还有幻想不？	2022-07-27 14:47:50	股吧网页版	i9154396009259924	2.7年	3	22853	65729	7
这只股票还得继续下跌，昨天一日游，今天又打回原形，下跌空间会到6元附近！	2022-07-27 10:22:45	东方财富Android版	w8426084969941706	6.1年	6	22853	65730	7
上砸下托，删自选了，没得看了这股	2022-07-27 11:06:43	股吧网页版	y4004336233806280	2年	4	22853	65731	7
还有一种薅羊毛的方式，就是小仓位的在7元左右进场，涨个5%就出。如此反复，若破6	2022-07-27 11:03:29	东方财富Android版	m6886094377214932	8年	7	22853	65732	7
砖头使劲砸，抛死他	2022-07-27 10:49:52	股吧网页版	i9154396009259924	2.7年	3	22853	65733	7
这么明显的出货方式，别说都看不懂。那只能说明你是接盘的命了。	2022-07-27 11:00:00	东方财富Android版	m6886094377214932	8年	7	22853	65734	7
下跌通道已开启	2022-07-27 10:41:52	东方财富iPhone版	h2739045326139796	4.9年	2	22853	65735	7
今天有跌停风险，无量反弹	2022-07-27 09:23:26	东方财富Android版	c2661085341548590	4.9年	4	22853	65736	7
旧的好，新的不好	2022-07-28 21:25:40	东方财富Android版	z8203145450500966	4.5年	4	22854	65738	7
可怜的小散户，被套牢了	2022-07-28 11:51:56	东方财富Android版	c2661085341548590	4.9年	4	22854	65739	7
每次都是上午快收盘使劲拉，下午开盘砸的更狠	2022-07-28 11:34:16	东方财富Android版	g3236386086208350	2.5年	4	22854	65740	7
今天继续大跌	2022-07-28 09:16:31	东方财富Android版	c2661085341548590	4.9年	4	22854	65741	7
杀猪盘票	2022-07-28 00:08:28	东方财富Android版	g6066014975299904	6年	4	22854	65742	7
杭汽轮B和你之间选了你，觉得人家3块涨到13，应该差不多了，没想到人家后来依旧涨	2022-07-29 09:43:49	东方财富Android版	m1356094519755732	7.5年	3	22855	65743	7
今天当一把龙头	2022-07-29 09:54:06	东方财富Android版	g3236386086208350	2.5年	4	22855	65745	7
这只票要补涨了，摘帽没大涨，现在要启动了。后期看好食品股，下周连板走起[想一下]	2022-07-30 16:49:04	东方财富Android版	g3041315831679850	3.3年	5	22856	65746	7
买买买，我要把主力赶走，自己当主力[想一下][鼓掌][鼓掌][鼓掌]	2022-07-31 11:11:35	东方财富Android版	g3041315831679850	3.3年	5	22857	65747	7
哈哈，越玩压力越大，回来我继续捡砖头砸	2022-08-01 13:45:05	股吧网页版	i9154396009259924	2.7年	3	22858	65748	7
连续两天龙头了，厉害	2022-08-01 10:29:16	东方财富Android版	s2764355943812982	2.9年	4	22858	65750	7
上上上	2022-08-01 10:16:20	东方财富Android版	s2764355943812982	2.9年	4	22858	65751	7
大盘跌板块跌我就涨，逆子	2022-08-01 10:15:31	东方财富Android版	g3236386086208350	2.5年	4	22858	65752	7
虽然可恶，想想最近几天不卖任何股票。就当捐了。	2022-08-02 12:32:52	股吧网页版	i9154396009259924	2.7年	3	22859	65753	7
尾盘已经干满仓了，明天起飞	2022-08-02 15:05:07	东方财富Android版	c2661085341548590	4.9年	4	22859	65755	7
还是你坚挺	2022-08-02 11:26:06	东方财富Android版	g9994015422975922	4.6年	3	22859	65756	7
今天是不是要大跌了	2022-08-02 09:19:08	东方财富Android版	g3236386086208350	2.5年	4	22859	65757	7
昨天千股大跌，07这几天逆势大涨，应是国企军工资产注入，市场这么便宜的军工题材很	2022-08-03 12:53:54	东方财富Android版	i9131376377367106	1.5年	4	22860	65758	7
一起看多做多，让主力抬轿，起飞	2022-08-03 22:13:10	东方财富Android版	c2661085341548590	4.9年	4	22860	65759	7
老子都加仓了，飞起来	2022-08-03 20:55:57	东方财富Android版	c2661085341548590	4.9年	4	22860	65760	7
突破新高，装优质资产，下一目标位12～15元	2022-08-03 13:25:23	东方财富Android版	i9131376377367106	1.5年	4	22860	65761	7
庄股，跑	2022-08-03 16:13:36	东方财富Android版	m1130094382577364	7.9年	7	22860	65762	7
全新好盘中最高8.07元，股价创近一年新高	2022-08-03 15:47:02	股吧网页版	p2369125312925066	5年	9	22860	65764	7
7.28的时候就走了，大腿都拍肿了，进了皇庭吃了两个跌停板	2022-08-03 14:27:02	东方财富iPhone版	b8818004774672978	6.7年	4	22860	65765	7
看好你，加油涨	2022-08-03 11:56:21	东方财富Android版	m1356094519755732	7.5年	3	22860	65766	7
这个龙头我做定啦，耶稣也拦不住	2022-08-03 11:10:23	东方财富Android版	g3236386086208350	2.5年	4	22860	65767	7
老子都满仓了，还不起飞	2022-08-03 10:12:39	东方财富Android版	c2661085341548590	4.9年	4	22860	65768	7
转发好文	2022-08-03 07:38:08	东方财富Android版	r1890406591797762	10个月	0	22860	65769	7
好帖转发	2022-08-03 06:46:09	东方财富Android版	q6768386589039882	10个月	0	22860	65770	7
加仓干啊，10个涨停板要来了，主力要抬轿了	2022-08-04 15:23:32	东方财富Android版	c2661085341548590	4.9年	4	22861	65771	7
下午就会大跳水，这个股就是这样	2022-08-04 10:50:51	东方财富Android版	g3236386086208350	2.5年	4	22861	65772	7
今天这个竞价就是引诱散户进场的	2022-08-04 09:54:51	东方财富Android版	g3236386086208350	2.5年	4	22861	65773	7
都干满仓了，还不起飞	2022-08-04 10:04:22	东方财富Android版	c2661085341548590	4.9年	4	22861	65774	7
妥妥的杀猪盘	2022-08-04 09:29:44	东方财富电脑版	m9626094570812394	7.3年	7	22861	65775	7
加仓了50万了，还不起飞	2022-08-04 09:20:26	东方财富Android版	c2661085341548590	4.9年	4	22861	65776	7
要起飞了，赶紧买加仓	2022-08-05 09:17:14	东方财富Android版	c2661085341548590	4.9年	4	22862	65777	7
这么多意的散户，老是希望大涨。这货就是区间横盘震荡出货走势。	2022-08-05 18:23:47	东方财富Android版	m6886094377214932	8年	7	22862	65778	7
今日7.88卖出200股目前持仓7400股	2022-08-05 16:59:54	股吧网页版	m2380094488373352	7.6年	6	22862	65779	7
板块的逆子	2022-08-05 10:10:28	东方财富Android版	g3236386086208350	2.5年	4	22862	65780	7
加仓干啊，要起飞了	2022-08-07 17:39:27	东方财富Android版	c2661085341548590	4.9年	4	22864	65781	7
加仓干	2022-08-07 17:39:46	东方财富Android版	c2661085341548590	4.9年	4	22864	65782	7
继续突破新高一路向上，，第一目标位维持12～15元	2022-08-08 11:28:34	东方财富Android版	i9131376377367106	1.5年	4	22865	65783	7
把前几天进的50万7.95出了，每天做1个点的T，好累	2022-08-08 17:33:26	东方财富Android版	c2661085341548590	4.9年	4	22865	65784	7
你不是2000多手压盘吗，我立马给你吃了，加仓200多万，就是干	2022-08-08 14:19:17	东方财富Android版	c2661085341548590	4.9年	4	22865	65785	7
收盘价8.65	2022-08-08 13:53:18	东方财富Android版	n7382054585614176	7.3年	5	22865	65786	7
加仓干啊，兄弟们，把主力洗出去	2022-08-08 13:19:27	东方财富Android版	c2661085341548590	4.9年	4	22865	65787	7
今天来个高点，我把剩余的半仓50万都给你	2022-08-09 09:20:58	东方财富Android版	c2661085341548590	4.9年	4	22866	65788	7
8.22卖了，希望不要后悔	2022-08-09 10:35:07	东方财富Android版	c2661085341548590	4.9年	4	22866	65789	7
明日8.89	2022-08-09 19:18:03	东方财富Android版	i4649135463981162	4.5年	4	22866	65790	7
利好不会涨	2022-08-09 22:02:51	股吧手机网页版	w5432075434688154	4.6年	4	22866	65791	7
等回到7.2再接回来，看看戏	2022-08-09 16:48:16	东方财富Android版	c2661085341548590	4.9年	4	22866	65792	7
全新好盘中最高8.26元，股价创近一年新高	2022-08-09 15:43:57	股吧网页版	p2369125312925066	5年	9	22866	65793	7
这都不抛，等着被套吧	2022-08-09 12:27:38	东方财富Android版	c2661085341548590	4.9年	4	22866	65794	7
无量上涨	2022-08-09 12:18:52	东方财富Android版	m6886094377214932	8年	7	22866	65795	7
有多少人今天追高进来的，等被套吧	2022-08-09 11:12:50	东方财富Android版	g3236386086208350	2.5年	4	22866	65796	7
今天好多人都清了吧	2022-08-09 10:45:39	东方财富Android版	g3236386086208350	2.5年	4	22866	65797	7
半个月时间又流出近一个亿的资金。股价晃晃悠悠的又回来了。还是那句话做T，又到区间	2022-08-10 21:52:03	东方财富Android版	m6886094377214932	8年	7	22867	65798	7
等回到7.2，我接盘	2022-08-10 11:46:35	东方财富Android版	c2661085341548590	4.9年	4	22867	65799	7
7.2还远吗	2022-08-10 14:06:33	东方财富Android版	c2661085341548590	4.9年	4	22867	65800	7
也不知道昨天追高的，今天有没有割肉	2022-08-10 11:57:48	东方财富Android版	c2661085341548590	4.9年	4	22867	65801	7
今天不争一争龙头吗	2022-08-10 10:33:18	东方财富Android版	g3236386086208350	2.5年	4	22867	65802	7
九阳神功牛批	2022-08-10 10:07:47	东方财富Android版	w7843346008382744	2.7年	2	22867	65803	7
从摘帽开始，我就在陪着你玩，我觉得你欠了我一个风光涨停，合适能来，在不来，我走了	2022-08-11 10:22:27	东方财富iPhone版	x3089326340232952	1.6年	4	22868	65804	7
见顶信号已出，7.2等你	2022-08-11 18:12:07	东方财富Android版	c2661085341548590	4.9年	4	22868	65805	7
上去卖下来买，做小波段，每个波段都是15个点	2022-08-11 18:49:24	东方财富Android版	c2661085341548590	4.9年	4	22868	65806	7
短期或许会有回调，但应该不会创新低	2022-08-11 17:15:02	股吧网页版	u1404306354275290	1.6年	0	22868	65807	7
看你就像心电图	2022-08-12 13:28:59	东方财富Android版	a2212114588321970	7.3年	3	22869	65808	7
7.2等你	2022-08-12 15:19:17	东方财富Android版	c2661085341548590	4.9年	4	22869	65809	7
不会又是09十字星吧	2022-08-12 14:58:28	东方财富iPhone版	x3089326340232952	1.6年	4	22869	65810	7
好帖文	2022-08-12 12:59:48	东方财富Android版	u3180476597807720	9个月	0	22869	65811	7
一路坚定稳步向上，必有利好，加油干	2022-08-12 10:17:33	东方财富Android版	i9131376377367106	1.5年	4	22869	65812	7
全新好看你那里都不好要死不活	2022-08-12 09:41:36	东方财富Android版	g5245306155614848	2.2年	4	22869	65813	7
叶飞概念股，鉴定完毕	2022-08-14 10:25:43	东方财富Android版	u2492315966143556	2.9年	7	22871	65814	7
典型的庄股	2022-08-14 10:25:33	东方财富Android版	u2492315966143556	2.9年	7	22871	65815	7
恶庄压盘，散了吧。起不来的	2022-08-15 10:05:49	东方财富Android版	g3236386086208350	2.5年	4	22872	65816	7
全新好盘中最高8.28元，股价创近一年新高	2022-08-15 15:46:53	股吧网页版	p2369125312925066	5年	9	22872	65817	7
几天就破个前高，嘚瑟一下就游泳，一眼没照顾到就过去了[捂脸]	2022-08-15 09:44:58	东方财富iPhone版	x3089326340232952	1.6年	4	22872	65818	7
大活加油干啊，我已经加仓50万	2022-08-16 18:16:48	东方财富Android版	c2661085341548590	4.9年	4	22873	65819	7
看突破8.5	2022-08-16 15:05:38	东方财富Android版	c2661085341548590	4.9年	4	22873	65820	7
回来一看，全是新面孔	2022-08-17 21:09:56	股吧网页版	m9257094760726130	6.7年	6	22874	65821	7
今天加了20万，干就完事了	2022-08-17 17:12:44	东方财富Android版	c2661085341548590	4.9年	4	22874	65822	7
早上7.8加仓了吗	2022-08-17 14:43:40	东方财富Android版	c2661085341548590	4.9年	4	22874	65823	7
哇咔咔砸的够狠，涨的时候可没这么痛快呢	2022-08-17 09:45:19	东方财富iPhone版	x3089326340232952	1.6年	4	22874	65824	7
明天涨停？	2022-08-18 13:41:15	东方财富Android版	t1525346317072198	1.7年	4	22875	65826	7
养了33天，玩儿回了成本线，依然没表现出来快感，既然如此，那就重新开始吧	2022-08-18 09:52:49	东方财富iPhone版	x3089326340232952	1.6年	4	22875	65827	7
一直跌倒8月底，9月初继续跌。大概率往下杀。	2022-08-18 22:18:57	东方财富Android版	m6886094377214932	8年	7	22875	65828	7
感谢老板派发筹码，真香，7.2等	2022-08-18 15:11:11	东方财富Android版	c2661085341548590	4.9年	4	22875	65829	7
加仓20万，感谢老板派发筹码	2022-08-18 10:44:43	东方财富Android版	c2661085341548590	4.9年	4	22875	65830	7
加油干啊，不要怂	2022-08-18 09:20:18	东方财富Android版	c2661085341548590	4.9年	4	22875	65831	7
今日已经进场，看多。	2022-08-19 15:27:28	东方财富Android版	b2830305590377122	4.1年	4	22876	65832	7
到了九块有一大批股解套小心哦	2022-08-19 18:15:28	东方财富Android版	p1024074945303466	6.1年	4	22876	65833	7
又是新高，不会又绿三天吧	2022-08-19 16:30:19	东方财富Android版	g3236386086208350	2.5年	4	22876	65834	7
继续加仓15万	2022-08-19 13:51:29	东方财富Android版	c2661085341548590	4.9年	4	22876	65835	7
全新好盘中最高8.33元，股价创近一年新高	2022-08-19 15:47:45	股吧网页版	p2369125312925066	5年	9	22876	65836	7
散户们别高兴的太早了，这股随时随地要你的命	2022-08-19 18:14:10	东方财富Android版	p1024074945303466	6.1年	4	22876	65837	7
有人卖飞吗	2022-08-19 14:24:52	东方财富iPhone版	h2739045326139796	4.9年	2	22876	65838	7
继续加仓20万	2022-08-19 11:26:33	东方财富Android版	c2661085341548590	4.9年	4	22876	65839	7
还要跌	2022-08-19 09:25:14	东方财富Android版	g3236386086208350	2.5年	4	22876	65840	7
查了一下全新好在华强北中心地带还有众多优质物业，如果价值按现有价值估值的话至少2	2022-08-22 10:38:29	东方财富Android版	i9131376377367106	1.5年	4	22879	65841	7
全新好盘中最高8.37元，股价连续两日创近一年新高	2022-08-22 15:51:24	股吧网页版	p2369125312925066	5年	9	22879	65843	7
明天涨停	2022-08-23 18:19:45	东方财富Android版	i4649135463981162	4.5年	4	22880	65844	7
玩了一个寂寞	2022-08-23 13:59:13	东方财富Android版	g5245306155614848	2.2年	4	22880	65845	7
一起干啊，不要怂	2022-08-23 16:17:59	东方财富Android版	c2661085341548590	4.9年	4	22880	65846	7
我尾盘加仓了20万，明天吃肉	2022-08-23 16:17:42	东方财富Android版	c2661085341548590	4.9年	4	22880	65847	7
可以举报一下，大单不停地对敲	2022-08-23 14:01:51	东方财富Android版	m6886094377214932	8年	7	22880	65848	7
好有几个交易日，看走势应该能摸一下9元这个位置，但中报一出，就要哗哗的下跌了。	2022-08-23 13:10:54	东方财富Android版	m6886094377214932	8年	7	22880	65849	7
小庄出货好手，半个月时间，又跑了1.5个亿	2022-08-23 13:08:17	东方财富Android版	m6886094377214932	8年	7	22880	65850	7
我又回来了，加仓干啊，已加仓20万	2022-08-23 11:38:11	东方财富Android版	c2661085341548590	4.9年	4	22880	65851	7
高看你时，新高后三连阴，不看你时，新高后三连阳，还真是调皮[捂脸]	2022-08-23 09:53:19	东方财富iPhone版	x3089326340232952	1.6年	4	22880	65852	7
明天大概率是一根大阳线	2022-08-24 15:05:21	东方财富Android版	r7149306280501774	1.8年	3	22881	65853	7
加仓干不要怂，	2022-08-24 23:39:51	东方财富Android版	c2661085341548590	4.9年	4	22881	65855	7
涨几分，跌几毛，跟中国石油有的一拼	2022-08-24 11:33:09	东方财富Android版	g3236386086208350	2.5年	4	22881	65856	7
如此看来，算是完美躲避了一下下，后续在关注咯	2022-08-25 14:21:36	东方财富iPhone版	x3089326340232952	1.6年	4	22882	65858	7
已半仓，等了好久才回调	2022-08-25 14:01:50	股吧网页版	c4674355674760780	3.8年	4	22882	65859	7
我赞成加油,[下跌][财神]	2022-08-28 20:48:06	东方财富Android版	h5000436614138666	9个月	0	22885	65861	7
很好,[复盘][买入]	2022-08-28 18:44:51	东方财富Android版	v5141416614158724	9个月	0	22885	65862	7
加油啊,[大哭][呲牙]	2022-08-28 17:29:09	东方财富Android版	w4980436614129636	9个月	1	22885	65863	7
明天不会砸跌停吧	2022-08-29 20:07:05	东方财富Android版	g3236386086208350	2.5年	4	22886	65864	7
十大股东减仓的那些人，就是上次8块开始暴跌的始作俑者，8块跌倒2快多，抄底，又拉	2022-08-29 19:37:45	东方财富Android版	m6886094377214932	8年	7	22886	65865	7
全新好：2022上半年净利润亏损998.98万元，上年同期亏损228.41万元	2022-08-29 19:18:20	股吧网页版	s2491125312925070	5年	10	22886	65866	7
我赞成,[左哼哼][右哼哼]	2022-08-29 18:15:39	东方财富Android版	l4602456614165340	9个月	0	22886	65867	7
一万个	2022-08-29 15:32:35	东方财富Android版	p9175145413194582	4.6年	3	22886	65868	7
往死里砸	2022-08-29 13:08:16	东方财富Android版	g5245306155614848	2.2年	4	22886	65869	7
年报亏损持续下跌	2022-08-29 11:16:54	东方财富Android版	g3236386086208350	2.5年	4	22886	65870	7
加油啊,[大哭][呲牙]	2022-08-29 03:09:37	东方财富Android版	u5158416614165256	9个月	0	22886	65871	7
厉害啊,[泡沫][成交]	2022-08-29 02:04:21	东方财富Android版	y5026496614141172	9个月	0	22886	65872	7
才是好,[笑哭][惊吓]	2022-08-30 22:27:07	东方财富Android版	u4692456614204742	9个月	0	22887	65873	7
明日预测：触涨停回落，5个点收盘。	2022-08-30 18:43:01	东方财富Android版	i4649135463981162	4.5年	4	22887	65874	7
高开低走，标准出货形态，给机会跑了。良心庄	2022-08-30 10:31:04	东方财富Android版	h9076306388342614	1.5年	0	22887	65875	7
快冲啊,[得意][害羞羞]	2022-08-30 11:55:04	东方财富Android版	z8140486616640334	9个月	0	22887	65876	7
涨停	2022-08-30 11:16:40	东方财富Android版	r6111044771048054	6.7年	7	22887	65877	7
明显诱多，早盘高位又出不少货，马上又要跌了，快跑	2022-08-30 10:27:15	东方财富Android版	h9076306388342614	1.5年	0	22887	65878	7
说得好,[奸笑][吃瓜]	2022-08-31 20:53:32	东方财富Android版	z5122436614195588	9个月	0	22888	65879	7
呵呵，怎么地呢，又要破高？？？	2022-09-01 13:14:41	东方财富iPhone版	x3089326340232952	1.6年	4	22889	65880	7
做的节奏	2022-09-01 20:19:20	东方财富Android版	w4139365761169824	3.5年	4	22889	65881	7
咬牙切齿，做庄的能赚钱？估计要爆仓	2022-09-01 20:13:57	东方财富Android版	w4139365761169824	3.5年	4	22889	65883	7
明天跌停	2022-09-01 20:03:59	东方财富iPhone版	l3801396049710168	2.6年	5	22889	65884	7
按尿性，明天估计涨停	2022-09-01 19:17:00	东方财富Android版	i4649135463981162	4.5年	4	22889	65885	7
今天复盘，全新好明天还可以	2022-09-01 15:55:12	东方财富iPhone版	w1740346106298096	2.4年	6	22889	65886	7
全新好盘中最高8.54元，股价创近一年新高	2022-09-01 15:45:42	股吧网页版	p2369125312925066	5年	9	22889	65887	7
这是闹啥嘞[捂脸]又稀里糊涂猜中啦！可惜我没买，错过了[哭]	2022-09-01 14:53:06	东方财富iPhone版	x3089326340232952	1.6年	4	22889	65888	7
明天肯定高开，没上车的，上不了啦	2022-09-01 15:30:42	东方财富Android版	g3236386086208350	2.5年	4	22889	65889	7
停车，我还没上车	2022-09-01 14:58:49	东方财富iPhone版	l3801396049710168	2.6年	5	22889	65890	7
对敲诱多	2022-09-01 14:32:23	东方财富Android版	k8649134896231892	6.3年	6	22889	65891	7
明天涨停	2022-09-01 14:26:32	东方财富iPhone版	l3801396049710168	2.6年	5	22889	65892	7
又是出货的一天	2022-09-01 09:31:39	东方财富Android版	m6886094377214932	8年	7	22889	65893	7
今天不涨停，走势可以参考7月1号	2022-09-02 13:44:38	东方财富Android版	m6886094377214932	8年	7	22890	65895	7
多方强势，下周看到9.55	2022-09-02 19:01:34	东方财富Android版	i4649135463981162	4.5年	4	22890	65896	7
赞！	2022-09-02 20:15:07	东方财富Android版	d4985436608770580	9个月	0	22890	65897	7
全新好盘中最高8.88元，股价连续两日创近一年新高	2022-09-02 15:45:39	股吧网页版	p2369125312925066	5年	9	22890	65898	7
8.88，拜拜了。。。并且红三兵，周一怎么走呢[想一下]	2022-09-02 15:43:03	东方财富iPhone版	f8909376450020238	1.3年	4	22890	65899	7
谁买套谁	2022-09-02 10:22:35	东方财富iPhone版	l3801396049710168	2.6年	5	22890	65900	7
涨涨涨	2022-09-02 10:04:27	东方财富Android版	b8827396391214388	1.5年	0	22890	65901	7
这个厉害了，翻了好几倍，牛[赞]	2022-09-02 04:30:46	东方财富Android版	k9903345843223336	3.2年	5	22890	65902	7
好啊,[主力][梭哈]	2022-09-02 00:19:47	东方财富Android版	v5058436603830902	9个月	0	22890	65903	7
这公司到底做什么的，看半天没看懂	2022-09-03 08:57:46	东方财富Android版	l5816396422660008	1.4年	4	22891	65904	7
我赞成加油,[下跌][财神]	2022-09-03 08:29:50	东方财富Android版	c4200356531272186	1年	1	22891	65905	7
挺好,[卖出][满仓]	2022-09-03 02:11:22	东方财富Android版	e1840486591797714	10个月	0	22891	65906	7
吐血！隔壁st金洲又出利好公告了！	2022-09-04 22:11:24	东方财富Android版	j6667385830401500	3.3年	5	22892	65907	7
好	2022-09-04 21:37:28	股吧手机网页版	h7903386004901166	2.7年	3	22892	65908	7
明天会不会一字板	2022-09-05 21:38:41	东方财富Android版	f3464236623848608	8个月	1	22893	65909	7
原来近期利空不断，财联社连发2篇3年前利空消息的文章，是为了举牌前低吸散户的廉价	2022-09-05 20:25:46	东方财富电脑版	p1152316143398312	2.3年	2	22893	65910	7
居然举牌了，终于等到了，这波能上12吗？	2022-09-05 19:55:02	东方财富电脑版	a1291276212248112	2.1年	0	22893	65911	7
查了一下举牌方，合伙人中，有几位高手。看来非常看好，坐等吃肉	2022-09-05 20:41:31	东方财富Android版	b1519446623809228	8个月	0	22893	65912	7
一字板起飞了	2022-09-05 21:11:44	东方财富Android版	m3823094297028722	8.2年	5	22893	65913	7
优质的壳公司加上资本大佬的助力，故事想象空间巨大，要是后期装入新能源资产或者军工	2022-09-05 21:47:54	东方财富Android版	f3464236623848608	8个月	1	22893	65914	7
近期难怪这么强势，举牌了，大佬终于浮出水面，从幕后走向前台，下一步应该是进董事会	2022-09-05 19:51:23	东方财富Android版	i9131376377367106	1.5年	4	22893	65915	7
重大利好啊，举牌全新了，大股东要换资本大佬了，开始腾飞	2022-09-05 20:33:03	东方财富Android版	w8550376388337960	1.5年	1	22893	65916	7
举牌了...举牌了...举牌了...重要的事情说三遍......大盘一潭死水，什	2022-09-05 20:12:27	东方财富Android版	v1314144539988836	7.4年	2	22893	65917	7
冲啊，奋不顾身冲进来了	2022-09-05 09:42:51	东方财富Android版	b2559355511527202	4.3年	4	22893	65918	7
先见之明	2022-09-05 19:46:36	东方财富Android版	e7845385815728348	3.3年	1	22893	65919	7
200手	2022-09-05 14:29:26	东方财富Android版	g3856365948773058	2.9年	2	22893	65920	7
板块下来你跟着下来，板块上去了你无动于衷？	2022-09-05 11:28:01	东方财富Android版	s2409396375111492	1.5年	5	22893	65921	7
果然垃圾缩量了，维持之前判断。出货种。	2022-09-05 11:05:34	东方财富Android版	m6886094377214932	8年	7	22893	65922	7
8.5的成本，不知能走多远。	2022-09-05 09:49:19	东方财富Android版	j3272386115326198	2.4年	3	22893	65923	7
听说公司有重大利好	2022-09-05 09:55:27	股吧网页版	h7903386004901166	2.7年	3	22893	65924	7
出货	2022-09-05 09:52:44	东方财富Android版	u4767386352926094	1.6年	3	22893	65925	7
8块6成本，不知道能给多少汤喝	2022-09-05 09:44:41	东方财富Android版	b2559355511527202	4.3年	4	22893	65926	7
昨晚唱多的ID，十个里面起码有八个是拖。	2022-09-06 14:39:33	股吧网页版	ghz2013	10.2年	7	22894	65927	7
兄弟们，准备好了吗，收盘就涨停了，跟着我发发发[鼓掌]	2022-09-06 14:25:32	东方财富iPhone版	d2936386578810118	10个月	3	22894	65928	7
坐庄坐到举牌了，呵呵，这水平也是差的一塌糊涂！	2022-09-06 07:03:57	东方财富电脑版	hw75287528	12.4年	8	22894	65929	7
没有拉萨和华鑫不怕	2022-09-06 22:52:39	股吧Android版	q6569376156192050	2.2年	0	22894	65930	7
明天跌停	2022-09-06 22:03:01	东方财富Android版	l4679004677687114	7年	5	22894	65931	7
上当了？8.48进了[好困惑]	2022-09-06 14:13:46	东方财富Android版	u9683305869216146	3.2年	5	22894	65932	7
嘿嘿嘿，兄弟们上车了吗？即将连板，跟着我一起发发发！！！[鼓掌]	2022-09-06 19:44:30	东方财富iPhone版	d2936386578810118	10个月	3	22894	65933	7
虫虎榜	2022-09-06 20:21:30	东方财富Android版	u4601306565160622	11个月	3	22894	65934	7
这股票明天不是跌停就是涨停，就看机构那个强了强者为王	2022-09-06 20:05:46	东方财富Android版	c3935346475657476	1.2年	4	22894	65935	7
大绿柱多么吓人，清仓了吗？	2022-09-06 19:58:23	东方财富Android版	g1415176583574592	10个月	4	22894	65936	7
溜了溜了，8.22溜的，扛不住你的操作，亏了1000多米，不陪你玩了，永生不相见	2022-09-06 14:37:49	东方财富Android版	v9191406611797044	9个月	2	22894	65937	7
明天开盘就跑	2022-09-06 15:07:37	东方财富Android版	m2822093916771292	9.4年	7	22894	65938	7
趋势所在，看懂吃肉	2022-09-06 18:37:16	股吧Android版	t6137436614939936	9个月	0	22894	65940	7
哪位大神讲一下这是出货吗？为什么主力资金流入两千多万，我是韭菜不太懂	2022-09-06 16:44:29	东方财富Android版	p3545376558173414	11个月	1	22894	65941	7
昨天在其他股票评论区看到有人到处喊，昨晚进来看看都是唱多的，还有扬言要打板的，今	2022-09-06 11:55:26	东方财富Android版	v7735326217816946	2年	5	22894	65942	7
全新好收盘大跌6.90% 两机构卖出2180万元	2022-09-06 16:42:23	股吧网页版	d2794125312925112	5年	9	22894	65943	7
果然诱多	2022-09-06 14:21:24	东方财富Android版	w1371396553483912	11个月	5	22894	65944	7
849上车，一会没看我特么	2022-09-06 14:31:35	东方财富iPhone版	g1445396564157940	11个月	4	22894	65945	7
超大单流出四千万？还不跌停，为什么？因为爱所以爱	2022-09-06 11:15:12	东方财富Android版	a6701385893815200	3.1年	6	22894	65946	7
放心好了，既然摘帽不可能就这样子的，一定会翻倍是最基本的，你看着吧，明天低开高走	2022-09-06 15:06:50	东方财富Android版	a4185366546828630	11个月	5	22894	65947	7
补仓补太早了[哭]	2022-09-06 15:06:32	东方财富Android版	p9826396043086384	2.6年	3	22894	65948	7
自己拉自己砸牛逼	2022-09-06 14:40:37	东方财富Android版	p2892335774291516	3.5年	3	22894	65949	7
赶紧跑，，，，，，垃圾股，，，，，坑。。。。。高位找人接盘	2022-09-06 14:38:31	东方财富Android版	l6295336152433822	2.3年	5	22894	65950	7
买吧，如果重组成功，就会有连板涨停的节奏	2022-09-06 12:20:30	东方财富Android版	y6378356532246834	1年	3	22894	65951	7
真垃圾[傲][傲][傲]	2022-09-06 14:31:50	东方财富Android版	t4159386443957956	1.3年	5	22894	65952	7
断头铡刀快跑	2022-09-06 14:17:48	东方财富iPhone版	s4357325547153078	4.2年	3	22894	65953	7
看到股吧鬼哭狼嚎的时候，就是买进的机会。	2022-09-06 14:08:52	东方财富Android版	y1463376195106568	2.1年	5	22894	65954	7
10001000的挺有劲？？？砸死你	2022-09-06 13:57:39	东方财富Android版	h1494365508351746	4.3年	5	22894	65956	7
明天继续跌停	2022-09-06 13:28:55	东方财富iPhone版	p8625315537420854	4.2年	7	22894	65957	7
大单砸盘，小单拉	2022-09-06 13:24:31	东方财富Android版	z8461114908446240	6.3年	6	22894	65959	7
好大一根棒棒	2022-09-06 13:18:22	东方财富Android版	l4963396116251628	2.4年	4	22894	65960	7
今天这种放量，要么洗盘，要么出货，看尾市，收上去就能分辨出来了。	2022-09-06 13:13:44	东方财富Android版	e7845385815728348	3.3年	1	22894	65961	7
今天不加仓	2022-09-06 12:58:47	东方财富Android版	m9739094196846240	8.5年	4	22894	65962	7
牌子举反了，杀猪了	2022-09-06 12:54:29	东方财富Android版	w1371396553483912	11个月	5	22894	65963	7
今晚出减持公告？	2022-09-06 12:52:59	东方财富Android版	m2822093916771292	9.4年	7	22894	65964	7
也不想想，底部起来翻了近四倍，而且筹码太集中，9元以下的散户基本在底部全被洗光了	2022-09-06 12:29:15	东方财富Android版	m6886094377214932	8年	7	22894	65965	7
5%筹码被锁定半年，主力要出只能出其他的，看看他有多少筹码，散户在大跌后不可能卖	2022-09-06 12:26:53	东方财富Android版	t1961084588161394	7.3年	5	22894	65966	7
倒血霉了，开盘没卖出去	2022-09-06 12:10:22	东方财富Android版	c6857335510776852	4.3年	4	22894	65967	7
是不是家里有把的都走了，缺点钱，烧？？？	2022-09-06 12:04:01	东方财富iPhone版	k9403104579447090	7.3年	4	22894	65968	7
$全新好(SZ000007)$	2022-09-06 11:44:11	东方财富iPhone版	m3869094667921198	7年	1	22894	65969	7
增持时间点为7-1，8-1，9-1，还是在竞价盘买的，如果想继续增持，肯定在价低	2022-09-06 11:41:41	东方财富iPhone版	m3869094667921198	7年	1	22894	65970	7
整个市场就只有12只跌超过百分之5的	2022-09-06 11:31:05	东方财富Android版	p2892335774291516	3.5年	3	22894	65971	7
上市公司和庄家勾结的吧？	2022-09-06 11:28:58	东方财富Android版	m2822093916771292	9.4年	7	22894	65972	7
八块钱把剩下的两层打光了	2022-09-06 11:28:16	东方财富Android版	x8191396154536958	2.2年	3	22894	65973	7
利好出尽就是利空全新好真不好	2022-09-06 11:20:27	东方财富Android版	g5245306155614848	2.2年	4	22894	65974	7
7.6我等你	2022-09-06 11:20:12	东方财富Android版	c2661085341548590	4.9年	4	22894	65975	7
套死你们这些追高的，明天还得跌	2022-09-06 11:19:06	东方财富Android版	c2661085341548590	4.9年	4	22894	65976	7
买盘这么多，怎么成这样	2022-09-06 11:14:50	东方财富Android版	p2614376115823582	2.4年	2	22894	65977	7
利好出货，一点脸都不要啦	2022-09-06 11:13:33	东方财富Android版	g3236386086208350	2.5年	4	22894	65978	7
还能怕你啊	2022-09-06 10:48:42	东方财富Android版	g3856365948773058	2.9年	2	22894	65979	7
这几天大资金进来就是为了赔钱？等的吧，资金流出一个亿了再跑	2022-09-06 10:47:57	东方财富Android版	k8749375706699192	3.7年	6	22894	65980	7
板块奇葩	2022-09-06 10:44:39	东方财富Android版	k8749375706699192	3.7年	6	22894	65981	7
上午洗洗 下午拉红	2022-09-06 10:30:10	股吧网页版	bg20083213	8.9年	8	22894	65983	7
洗吧洗吧，洗不干净，在拿刷子刷一刷	2022-09-06 10:25:27	东方财富Android版	p3545376558173414	11个月	1	22894	65984	7
一根大柱子不跑等什么	2022-09-06 10:07:38	东方财富Android版	p6275355762478860	3.5年	7	22894	65987	7
加仓加仓，加钱加钱	2022-09-06 09:50:05	东方财富Android版	b2559355511527202	4.3年	4	22894	65988	7
来！！大家一起喊跌停！	2022-09-06 10:00:10	东方财富Android版	s2596236176903232	2.2年	4	22894	65990	7
8元成本这么砸是获利了结	2022-09-06 09:45:46	东方财富Android版	s2596236176903232	2.2年	4	22894	65992	7
看好的小散户，赶紧跑步进场啊，老庄砸盘停车接你们上车了，哈哈哈哈	2022-09-06 09:43:21	东方财富Android版	m6886094377214932	8年	7	22894	65993	7
喜新厌旧心情好，今天准备买入。	2022-09-06 09:38:45	股吧手机网页版	j1256325769287706	3.5年	7	22894	65994	7
踏马的什么意思	2022-09-06 09:33:08	东方财富Android版	p9175145413194582	4.6年	3	22894	65995	7
大家跑了吗？	2022-09-07 16:50:19	东方财富Android版	n2941476624699344	8个月	2	22895	65996	7
举牌有两种意思，请不要误导	2022-09-07 10:57:05	股吧网页版	ghz2013	10.2年	7	22895	65997	7
学习好,[拜神][胜利]	2022-09-07 22:48:47	东方财富Android版	k8415476622169276	8个月	0	22895	65998	7
明天不拉就走了，你们发财	2022-09-07 21:08:57	东方财富Android版	a4185366546828630	11个月	5	22895	65999	7
我跑了	2022-09-07 22:06:33	东方财富Android版	n2941476624699344	8个月	2	22895	66000	7
看到庄的操作我都笑了，8.14没人买就撤单挂8.13，8.13没人买就撤单挂8.	2022-09-07 14:56:56	东方财富Android版	w4019376546825186	11个月	1	22895	66001	7
主力横盘一天了有什么用？	2022-09-07 15:21:31	东方财富Android版	g1415176583574592	10个月	4	22895	66002	7
不跌到7.6是不会涨得	2022-09-07 17:41:37	东方财富Android版	c2661085341548590	4.9年	4	22895	66003	7
这是我目前见过短线操作最牛的一个，还是马前炮选手，必须给你赞一个！	2022-09-07 20:29:05	东方财富Android版	l3072186618457378	9个月	0	22895	66004	7
加油啊,[大哭][呲牙]	2022-09-07 18:57:41	东方财富Android版	l8635496622127646	8个月	0	22895	66005	7
昨天不上黑芝麻居然上你，悔啊	2022-09-07 14:20:49	东方财富Android版	u9683305869216146	3.2年	5	22895	66006	7
可能给你们挖个坑走主升浪	2022-09-07 17:34:45	东方财富iPhone版	y4291306417449646	1.4年	3	22895	66007	7
大家都跑了吗？	2022-09-07 16:50:45	东方财富Android版	n2941476624699344	8个月	2	22895	66008	7
这12个点玩了一天	2022-09-07 14:58:45	东方财富Android版	a4185366546828630	11个月	5	22895	66009	7
十分好,[赞][握手]	2022-09-07 13:51:04	东方财富Android版	n4949446614195686	9个月	0	22895	66010	7
半死不活	2022-09-07 13:14:17	东方财富Android版	i4649135463981162	4.5年	4	22895	66011	7
垃圾	2022-09-07 12:27:19	东方财富Android版	w4427366325834486	1.7年	3	22895	66012	7
上车了吗，兄弟们，下午涨停，跟我一起发发发[鼓掌]	2022-09-07 10:45:31	东方财富iPhone版	d2936386578810118	10个月	3	22895	66013	7
不需要涨停，只要翻红就好	2022-09-07 10:43:16	东方财富Android版	u4601306565160622	11个月	3	22895	66014	7
举牌方老鼠仓出货中	2022-09-07 10:11:27	东方财富Android版	sg197901	9.3年	5	22895	66015	7
股市不就是赌吗？这时候不拿点魄力出来，还混着干嘛，干干干！！加仓全仓买入	2022-09-07 10:14:36	东方财富Android版	a4185366546828630	11个月	5	22895	66016	7
8元强支撑，下面大单撑着，放心加仓了	2022-09-07 09:44:43	东方财富Android版	b2559355511527202	4.3年	4	22895	66017	7
涨停在明天	2022-09-07 09:50:32	东方财富Android版	a6701385893815200	3.1年	6	22895	66018	7
马上就要涨停了，刚摘帽你感觉会是这个价？没翻倍谁会走	2022-09-07 09:37:50	东方财富Android版	a4185366546828630	11个月	5	22895	66019	7
历史举牌股有涨有跌，宝馨6月底屠文斌举牌，一个月翻倍，条件是得有风口	2022-09-07 08:17:01	东方财富电脑版	k8749375706699192	3.7年	6	22895	66020	7
？？？	2022-09-07 08:53:15	东方财富电脑版	r5785255852893888	3.2年	1	22895	66021	7
买了一个多亿，股价不涨，未来十个月还不能卖，应该有大动作吧	2022-09-07 08:30:43	东方财富Android版	k8749375706699192	3.7年	6	22895	66022	7
明天会高开高走，下午回落	2022-09-08 19:28:45	东方财富Android版	a4185366546828630	11个月	5	22896	66023	7
大力举牌了还怕啥，不管怎么涨跌，反正不翻倍决不出	2022-09-08 14:44:01	东方财富Android版	v1314144539988836	7.4年	2	22896	66024	7
主力巳在周二逢高出货完毕，避免补仓，越补套的越深。	2022-09-08 15:43:42	东方财富Android版	i4649135463981162	4.5年	4	22896	66025	7
今天又要原地踏步	2022-09-08 10:29:55	东方财富Android版	a4185366546828630	11个月	5	22896	66026	7
这货一旦高开就完蛋了	2022-09-08 14:53:46	东方财富Android版	g5245306155614848	2.2年	4	22896	66027	7
来了个168，要一路发吗？	2022-09-08 14:23:02	东方财富Android版	p3168346425820546	1.4年	3	22896	66028	7
人才，1手1手1手	2022-09-09 11:10:25	股吧手机网页版	z1186456596793292	9个月	1	22897	66029	7
17.152的成本，持有好几年了，哎！ 大涨大跌 感觉都和自己无关了。	2022-09-09 14:10:05	股吧网页版	b3869496619234006	9个月	3	22897	66030	7
才是好,[笑哭][惊吓]	2022-09-09 20:04:03	东方财富Android版	n4167386531291236	1年	0	22897	66031	7
叼，走了。去麒盛	2022-09-09 10:27:37	东方财富Android版	u9683305869216146	3.2年	5	22897	66032	7
好好很好,[上涨][拳头]	2022-09-09 10:05:52	东方财富Android版	e1025316585613164	10个月	0	22897	66033	7
我赞成加油,[下跌][财神]	2022-09-10 23:03:43	东方财富Android版	o8457486622148428	8个月	0	22898	66034	7
快冲啊,[得意][害羞羞]	2022-09-10 18:25:14	东方财富Android版	t8078456622138610	8个月	0	22898	66035	7
倘若举牌者就是庄家	2022-09-11 14:55:03	股吧网页版	t7062074907491466	6.3年	6	22899	66036	7
可以放心抄底了	2022-09-12 23:33:37	东方财富Android版	g3041315831679850	3.3年	5	22900	66037	7
121	2022-09-12 21:34:36	东方财富Android版	r2697346402587744	1.4年	0	22900	66038	7
满仓	2022-09-13 15:04:36	东方财富Android版	g3856365948773058	2.9年	2	22901	66039	7
很好啊,[怒][滴汗]	2022-09-13 21:38:53	东方财富Android版	t8390476622152578	8个月	0	22901	66040	7
学习好,[拜神][胜利]	2022-09-13 18:29:26	东方财富Android版	e8100456622148606	8个月	0	22901	66042	7
两市指数在连续2天宽幅调整后迎来中阳反弹	2022-09-13 17:27:59	股吧网页版	r8085336088794622	2.5年	4	22901	66043	7
阶段调整有望告一段落，延续整体的向好趋势。	2022-09-13 17:21:13	股吧网页版	y1976326165548048	2.2年	4	22901	66044	7
明天创新高	2022-09-13 17:14:33	股吧网页版	d8760476595825094	9个月	3	22901	66045	7
流动性稳定下整体或将偏向宽裕，对市场带来提振	2022-09-13 17:08:14	股吧网页版	c4271346518248146	1.1年	4	22901	66046	7
满仓打板成功，坐等吃肉…	2022-09-13 17:01:58	股吧网页版	i5265095270597486	5.1年	5	22901	66047	7
叠加北向资金关注度较高的品种	2022-09-13 16:55:39	股吧网页版	c5754336357489344	1.6年	4	22901	66048	7
政策角度的“稳增长”或是阶段性的主线	2022-09-13 16:49:08	股吧网页版	f1168345949621198	2.9年	3	22901	66049	7
这票有行情，有票的偷着乐巴	2022-09-13 16:36:12	股吧网页版	c7242336358160666	1.6年	3	22901	66050	7
相信自己的判断	2022-09-13 16:42:45	股吧网页版	m8735375995290806	2.8年	4	22901	66051	7
晚了晚了，我还没上车	2022-09-13 16:29:56	股吧网页版	v3213365942955736	2.9年	5	22901	66052	7
打板的爷爷奶奶去哪里了	2022-09-13 14:07:35	东方财富Android版	l4963396116251628	2.4年	4	22901	66053	7
一个举牌不知坑了多少人	2022-09-13 14:21:04	东方财富Android版	y4148466603159316	9个月	0	22901	66054	7
无语死掉了	2022-09-13 13:48:07	东方财富iPhone版	s1881446624254402	8个月	0	22901	66055	7
此股已废	2022-09-13 10:09:33	东方财富Android版	i4649135463981162	4.5年	4	22901	66056	7
每次拉高都是出货，别上当，主力在流出资金	2022-09-13 09:45:46	东方财富Android版	l4679004677687114	7年	5	22901	66057	7
开启心电图走势	2022-09-13 09:32:16	东方财富Android版	g5245306155614848	2.2年	4	22901	66058	7
这个股很快起来的	2022-09-14 21:16:00	东方财富iPhone版	j8222376581950614	10个月	3	22902	66059	7
做一会带头大哥	2022-09-14 13:11:26	东方财富Android版	m9739094196846240	8.5年	4	22902	66060	7
全新好真的是没有买卖就没有伤害	2022-09-14 11:09:20	东方财富Android版	g5245306155614848	2.2年	4	22902	66061	7
现在唱多的那几个人的目的	2022-09-15 14:08:33	股吧网页版	ghz2013	10.2年	7	22903	66062	7
醉卧沙场113出来，此股难涨	2022-09-15 09:17:53	股吧网页版	ghz2013	10.2年	7	22903	66063	7
本金20万，一年全新好，赚了20万，战绩如何	2022-09-15 19:27:56	东方财富Android版	c2661085341548590	4.9年	4	22903	66064	7
问大家一个问题，炒股全新好一年赚20万，这个战绩如何	2022-09-15 16:25:29	东方财富Android版	c2661085341548590	4.9年	4	22903	66065	7
尾盘我拉的，明天大涨，抢点筹码	2022-09-15 15:12:30	东方财富Android版	g3236386086208350	2.5年	4	22903	66066	7
未来大牛股大盘不好，借机洗盘，会继续上拉，传举牌基金准备了近二十要举牌并购优质资	2022-09-15 13:33:17	东方财富Android版	v1314144539988836	7.4年	2	22903	66067	7
终于回本了，拿了两年了	2022-09-15 14:54:53	东方财富Android版	v4946125298008664	5年	6	22903	66068	7
尾盘是哪位兄弟？	2022-09-15 15:01:40	东方财富Android版	v6958356146761848	2.3年	4	22903	66069	7
全新好	2022-09-15 14:49:27	东方财富Android版	g5245306155614848	2.2年	4	22903	66070	7
走了走了	2022-09-15 14:04:20	东方财富Android版	n2941476624699344	8个月	2	22903	66071	7
高开低走	2022-09-15 09:34:11	东方财富Android版	g5245306155614848	2.2年	4	22903	66072	7
好机会,[加油][困顿]	2022-09-16 19:02:58	东方财富Android版	p4425406614192466	9个月	0	22904	66073	7
还好,[666][叹气]	2022-09-16 11:45:35	东方财富Android版	f4493406614233660	9个月	0	22904	66074	7
还好我昨天跑了	2022-09-16 11:32:36	东方财富Android版	n2941476624699344	8个月	2	22904	66075	7
所谓的绿举牌就是忽悠散户接盘的	2022-09-16 11:20:23	东方财富Android版	i4303375845877602	3.2年	4	22904	66076	7
7.5我来抄底	2022-09-16 11:16:12	东方财富Android版	g3236386086208350	2.5年	4	22904	66077	7
好啊,[主力][梭哈]	2022-09-16 11:07:51	东方财富Android版	n4844486614198194	9个月	0	22904	66078	7
优秀[勾引]	2022-09-19 21:27:23	东方财富Android版	n4822466614199162	9个月	0	22907	66079	7
改名叫“没好”吧？	2022-09-19 09:53:05	东方财富Android版	i4303375845877602	3.2年	4	22907	66080	7
双底形成，加仓干	2022-09-19 10:19:57	东方财富Android版	b2559355511527202	4.3年	4	22907	66081	7
走了走了拜拜了好不了	2022-09-19 10:15:58	东方财富Android版	n2941476624699344	8个月	2	22907	66082	7
走啦，这货已经完蛋啦	2022-09-19 09:51:05	东方财富Android版	g3236386086208350	2.5年	4	22907	66083	7
今天该涨了	2022-09-19 07:33:58	东方财富Android版	i4649135463981162	4.5年	4	22907	66084	7
佩奇[下跌]	2022-09-19 05:56:34	东方财富Android版	h9592436633935568	8个月	1	22907	66085	7
强啊[亲]	2022-09-19 03:21:13	东方财富Android版	p7994406622135336	8个月	0	22907	66086	7
奇怪，今天板块那么好，怎么走成这个样子[666]	2022-09-20 14:39:19	东方财富Android版	b9396355724976912	3.6年	4	22908	66087	7
尾盘这个拉升今天卖的人明天拍断腿	2022-09-20 15:01:36	东方财富Android版	g8606396401564786	1.5年	5	22908	66088	7
尾盘拉升，非奸即盗	2022-09-20 21:56:52	东方财富Android版	m9739094196846240	8.5年	4	22908	66089	7
明天开始拉升了，庄家这破操作不知道多少次了，都被小散看穿了	2022-09-20 19:04:33	东方财富Android版	b2559355511527202	4.3年	4	22908	66090	7
很好[亲]	2022-09-20 19:47:11	东方财富Android版	o8414476622168970	8个月	0	22908	66091	7
今天尾盘1小时，卖了的人，出来抖抖	2022-09-20 15:21:19	东方财富Android版	c2661085341548590	4.9年	4	22908	66092	7
太好好了，今天杀出恐慌盘，你们赶紧割肉	2022-09-20 10:04:37	东方财富Android版	c2661085341548590	4.9年	4	22908	66093	7
还有没有人在里面	2022-09-20 11:31:22	东方财富Android版	n2941476624699344	8个月	2	22908	66095	7
举牌反而跌	2022-09-20 12:34:22	东方财富Android版	m2822093916771292	9.4年	7	22908	66096	7
7.6砸了4000多手是谁砸的？	2022-09-20 11:20:35	股吧网页版	l8013376208078874	2.1年	3	22908	66097	7
把全新好往死里砸	2022-09-20 11:09:12	东方财富Android版	g5245306155614848	2.2年	4	22908	66098	7
把自己玩的没人气了	2022-09-20 10:07:14	东方财富Android版	m1042023857141668	9.6年	4	22908	66099	7
仁东的感觉	2022-09-20 09:46:09	东方财富Android版	c6545356248976990	1.9年	3	22908	66100	7
今天再接50万	2022-09-20 10:05:06	东方财富Android版	c2661085341548590	4.9年	4	22908	66101	7
明天大概率涨停了	2022-09-21 15:16:38	东方财富Android版	b2559355511527202	4.3年	4	22909	66102	7
完美洗筹，大盘企稳，准备起飞	2022-09-21 13:56:54	东方财富Android版	v1314144539988836	7.4年	2	22909	66103	7
尾盘故意拉成平盘，你才主力想干嘛呢？	2022-09-21 00:00:15	股吧网页版	m8569366454390074	1.3年	4	22909	66104	7
今天踩稳90日线确认反弹，三针探底必涨，随时拉升，抓紧上车，拭目以待，又要一大波	2022-09-21 14:05:06	东方财富Android版	v1314144539988836	7.4年	2	22909	66105	7
好啊[笑哭]	2022-09-21 22:20:42	东方财富Android版	y9456466634088246	8个月	0	22909	66106	7
是好[福]	2022-09-21 20:52:00	东方财富Android版	s9999456629744194	8个月	0	22909	66107	7
有没有可能收盘7.9	2022-09-21 14:54:26	东方财富Android版	b9396355724976912	3.6年	4	22909	66108	7
这股好玩一边吸一边洗	2022-09-21 14:47:42	东方财富iPhone版	y3760396368138508	1.6年	2	22909	66109	7
重组概念好，大盘稳，必涨，冲冲冲	2022-09-21 14:21:44	东方财富Android版	v1314144539988836	7.4年	2	22909	66110	7
房地产涨这么多都没用	2022-09-21 13:57:24	东方财富Android版	p1426315838919736	3.3年	6	22909	66111	7
你们赶紧买，买了我好解套	2022-09-21 12:16:09	东方财富Android版	c2661085341548590	4.9年	4	22909	66112	7
全新好老套路高开低走	2022-09-21 09:30:58	东方财富Android版	g5245306155614848	2.2年	4	22909	66113	7
小心专业得红苹果	2022-09-22 17:22:36	股吧网页版	ghz2013	10.2年	7	22910	66114	7
这几天都是大长腿，什么操作？	2022-09-22 21:49:23	东方财富Android版	g1415176583574592	10个月	4	22910	66115	7
挺好[兴奋]挺好[兴奋]挺好[兴奋]挺好[兴奋]挺挺好[兴奋]挺好[兴奋]挺好[	2022-09-22 21:01:25	东方财富Android版	w6829426609931926	9个月	0	22910	66116	7
赶紧满仓干啊，大利好即将来袭	2022-09-22 11:32:15	东方财富Android版	c2661085341548590	4.9年	4	22910	66117	7
我跑了，这算是利好吗？	2022-09-22 15:37:41	东方财富Android版	v6958356146761848	2.3年	4	22910	66118	7
我已经加仓100万了	2022-09-22 11:32:33	东方财富Android版	c2661085341548590	4.9年	4	22910	66119	7
快要爆利好了，今天各方又在明显疯狂低位吸筹了	2022-09-22 11:25:45	东方财富Android版	i9131376377367106	1.5年	4	22910	66120	7
大家一起摇起来，快起飞了	2022-09-22 11:07:27	东方财富Android版	b2559355511527202	4.3年	4	22910	66121	7
一大波买单涌入，起飞前兆，加油加油加油干	2022-09-22 11:02:57	东方财富Android版	v1314144539988836	7.4年	2	22910	66122	7
谁在里面50手50手的卖	2022-09-22 10:10:29	东方财富Android版	c2661085341548590	4.9年	4	22910	66123	7
这人气什么情况	2022-09-22 09:06:50	东方财富Android版	p1426315838919736	3.3年	6	22910	66124	7
佩服[旺柴]	2022-09-23 20:37:22	东方财富Android版	w4242336531289352	1年	0	22911	66125	7
尾市翻红，每天做差价真爽	2022-09-23 10:49:31	东方财富Android版	b2559355511527202	4.3年	4	22911	66126	7
跑吧！3000点守不住了	2022-09-23 14:37:54	东方财富Android版	y6378356532246834	1年	3	22911	66127	7
都在拼命揪，自救！	2022-09-23 14:21:45	东方财富Android版	v5787094968255886	6.1年	7	22911	66128	7
房地产板块疯狂了，全新好属房地产服务要蓄势补涨	2022-09-23 11:08:38	东方财富Android版	i9131376377367106	1.5年	4	22911	66129	7
物业管理公司为什么会亏钱？	2022-09-24 04:01:18	东方财富Android版	e8907336523362990	1.1年	2	22912	66130	7
66[发呆]	2022-09-24 21:26:27	东方财富Android版	z8492486622172488	8个月	0	22912	66131	7
厉害[奸笑]	2022-09-24 20:29:56	东方财富Android版	e4200336531282868	1年	0	22912	66132	7
节奏很重要	2022-09-25 13:18:03	东方财富Android版	d8063166153028632	2.3年	6	22913	66133	7
不错[大笑]	2022-09-26 20:40:13	东方财富Android版	v9669486633929958	8个月	0	22914	66134	7
我碧水卖房炒股10套全卖梭哈	2022-09-26 17:07:29	东方财富iPhone版	y3760396368138508	1.6年	2	22914	66135	7
有钱的人就是牛。没钱的人就是愁。玩股票有钱就是任性，不说多了，像这样的票拿5个亿	2022-09-26 16:57:43	东方财富Android版	y6772395963704458	2.9年	4	22914	66136	7
空仓二个月，一进就被埋了	2022-09-26 15:27:21	东方财富Android版	z2828356225564014	2年	4	22914	66137	7
总有几个自以为是的啥也不是的瞎BB	2022-09-26 15:00:37	股吧网页版	i9154396009259924	2.7年	3	22914	66138	7
不用看何时出公告，就这走势，我就知道他近期必有利好	2022-09-26 10:08:41	东方财富Android版	i9131376377367106	1.5年	4	22914	66139	7
怎么不在酒店板块了。	2022-09-26 11:28:46	东方财富iPhone版	j6559366098342194	2.4年	4	22914	66140	7
板块领跌，真是好样的	2022-09-26 09:47:52	东方财富Android版	p6877336509753206	1.1年	2	22914	66141	7
近期10月会有一大波利好	2022-09-27 13:11:59	东方财富Android版	i9131376377367106	1.5年	4	22915	66142	7
全仓抄入，等待翻倍	2022-09-27 14:06:56	东方财富Android版	b2559355511527202	4.3年	4	22915	66143	7
最大利好出来，接下来董事会换人，至少翻倍	2022-09-27 14:06:24	东方财富Android版	b2559355511527202	4.3年	4	22915	66144	7
阶段底部企稳，举牌重组概念，抄底好机会	2022-09-27 13:15:58	东方财富Android版	i9131376377367106	1.5年	4	22915	66145	7
有本事跌停，不要再钓鱼，钓不到的	2022-09-27 09:56:48	东方财富iPhone版	x5408376393606616	1.5年	2	22915	66146	7
各位今天怎么样呀？	2022-09-27 07:38:24	东方财富iPhone版	w9189416606363536	9个月	5	22915	66147	7
要开始发力了，耐心等待	2022-09-28 11:19:14	东方财富Android版	b2559355511527202	4.3年	4	22916	66148	7
官网上有利好，明天暴涨，哈哈哈	2022-09-28 19:16:51	东方财富Android版	c2661085341548590	4.9年	4	22916	66149	7
今日加仓20万，总仓80万，大伙一起干，把主力洗出去，抬高主力成本，	2022-09-28 15:45:49	东方财富Android版	c2661085341548590	4.9年	4	22916	66150	7
散户筹码好8个亿，主力才不到2个亿,就不能齐心协力把主力割了吗	2022-09-28 15:47:36	东方财富Android版	c2661085341548590	4.9年	4	22916	66151	7
外面一片哀嚎，就它最坚挺	2022-09-28 14:20:43	东方财富Android版	b2559355511527202	4.3年	4	22916	66152	7
天天唱利好的，狗托	2022-09-28 10:11:31	东方财富Android版	g3236386086208350	2.5年	4	22916	66153	7
大伙加仓干啊，吧主力吧主力洗出去，总仓位100万了，难不成我要举牌	2022-09-29 16:12:33	东方财富Android版	c2661085341548590	4.9年	4	22917	66154	7
一大波买盘抄底，必有大拉升。	2022-09-29 13:53:04	东方财富Android版	i9131376377367106	1.5年	4	22917	66155	7
加仓干啊，吧主力洗出去，已加仓20万	2022-09-29 10:43:21	东方财富Android版	c2661085341548590	4.9年	4	22917	66156	7
干吧啥也别说了	2022-09-30 13:54:38	东方财富Android版	z1007325911691958	3年	6	22918	66157	7
从2021-09月份玩到今天，1年了，也就赚了一倍，不甘心	2022-09-30 19:06:40	东方财富Android版	c2661085341548590	4.9年	4	22918	66158	7
看到没，开始启动了	2022-09-30 09:58:53	东方财富Android版	b2559355511527202	4.3年	4	22918	66159	7
今天落袋为安的好走不送，下周擎天指	2022-09-30 17:12:25	东方财富Android版	c2661085341548590	4.9年	4	22918	66160	7
今天保本清仓啦，祝你们好运	2022-09-30 15:10:54	东方财富Android版	g3236386086208350	2.5年	4	22918	66161	7
什么情况！昨天人气2000多！现在到65了？	2022-10-01 11:18:50	东方财富Android版	v4606336389766032	1.5年	4	22919	66162	7
有没有天理！一个亏损垃圾股！涨了一年半！翻了3倍！	2022-10-01 09:50:46	东方财富Android版	m8350094264225798	8.3年	5	22919	66163	7
十月十号之后三天内必涨5个点	2022-10-01 09:28:16	东方财富Android版	e1999226061016954	2.5年	4	22919	66164	7
取消物业才是真正的利好	2022-10-01 07:03:24	东方财富Android版	m9083094130843226	8.8年	5	22919	66165	7
托单出来必砸盘	2022-10-10 13:13:51	东方财富Android版	b9840345892728758	3.1年	4	22928	66166	7
压着不让涨，大单就想着出货	2022-10-12 15:00:30	股吧网页版	l8461366067111524	2.5年	4	22930	66167	7
一大波买单开始涌入了，反弹开始	2022-10-12 13:42:24	东方财富Android版	i9131376377367106	1.5年	4	22930	66168	7
庄股。	2022-10-13 10:16:11	东方财富Android版	l7881305989248548	2.8年	6	22931	66169	7
这个垃圾股，尽然还有人对它有希望[捂脸]	2022-10-14 10:24:06	东方财富Android版	g3236386086208350	2.5年	4	22932	66170	7
拉尾盘的周一低开	2022-10-14 22:38:26	东方财富Android版	v9155395537548372	4.2年	3	22932	66171	7
慢慢来，好酒在后面。要有耐心！	2022-10-14 20:00:24	东方财富Android版	f8538486606274496	9个月	1	22932	66172	7
天天尾盘竞价大单买是想干嘛？	2022-10-14 15:15:54	股吧网页版	l8461366067111524	2.5年	4	22932	66173	7
买了3次，每次都是这样，和大盘逆这来	2022-10-14 14:59:54	东方财富Android版	j9177366127888772	2.3年	5	22932	66174	7
不跟大盘不跟板块，庄家自娱自乐	2022-10-14 14:45:30	东方财富电脑版	z7446375676075162	3.8年	3	22932	66175	7
大跌没你，大涨也没你，你走你的独立行情！	2022-10-14 12:33:36	股吧网页版	l8013376208078874	2.1年	3	22932	66176	7
1	2022-10-14 09:45:54	东方财富电脑版	b9396355724976912	3.6年	4	22932	66177	7
真见鬼	2022-10-14 10:02:25	东方财富iPhone版	a8797366424831406	1.4年	2	22932	66178	7
好家伙，全市普涨行情，你还是板块唯一一个绿的	2022-10-14 09:46:29	股吧网页版	l8461366067111524	2.5年	4	22932	66179	7
尾盘大单周一一字板？[想一下]	2022-10-15 12:20:12	东方财富Android版	y1765306184712310	2.1年	3	22933	66180	7
看样子这些天主力一直憋着坏呢，接下来可能要大跌几天	2022-10-17 23:27:13	东方财富Android版	m3757094041802476	9年	6	22935	66181	7
今天也是倒数第一	2022-10-17 11:28:14	东方财富Android版	y1765306184712310	2.1年	3	22935	66182	7
[主力]主力画了个W，必胜，赢WIN[上涨][买入]	2022-10-18 14:47:05	东方财富Android版	i9131376377367106	1.5年	4	22936	66183	7
个人看法。这就一典型的庄股，大涨是不可能有的，没人接盘。庄只能天天对倒，跟踪长的	2022-10-18 15:53:21	股吧手机网页版	p8394366232269332	2年	2	22936	66184	7
这个走势，第三季报还是亏损，要打回ST	2022-10-18 10:50:53	东方财富Android版	g3236386086208350	2.5年	4	22936	66185	7
太假了	2022-10-19 14:55:43	东方财富Android版	i4649135463981162	4.5年	4	22937	66187	7
又是一分钱玩一天[捂脸][捂脸][捂脸]	2022-10-19 11:03:13	东方财富Android版	u1549446591532388	10个月	1	22937	66188	7
今天的量，说明了点什么问题？	2022-10-19 11:24:55	东方财富Android版	m2221094431930792	7.8年	3	22937	66189	7
参考去年9月走势，这几天会有几个跌停板	2022-10-20 12:23:29	东方财富Android版	c2661085341548590	4.9年	4	22938	66190	7
就是不让涨	2022-10-20 13:15:45	东方财富Android版	v9155395537548372	4.2年	3	22938	66191	7
久盘必跌	2022-10-20 12:24:12	东方财富Android版	c2661085341548590	4.9年	4	22938	66192	7
走了！留下来的发财[快哭了]	2022-10-20 12:00:01	东方财富Android版	p9820395662228210	3.8年	3	22938	66193	7
随时有下杀的风险	2022-10-20 11:56:35	东方财富Android版	l3565386484367402	1.2年	2	22938	66194	7
过分了	2022-10-21 13:54:55	东方财富iPhone版	a8797366424831406	1.4年	2	22939	66195	7
尾盘拉升，怒涨一分	2022-10-21 14:14:22	东方财富Android版	i4649135463981162	4.5年	4	22939	66196	7
横久必跌	2022-10-21 09:45:02	东方财富Android版	e4865356111281758	2.4年	4	22939	66197	7
有点像杀猪盘	2022-10-21 11:28:01	东方财富Android版	e4865356111281758	2.4年	4	22939	66198	7
这走势明显三季度经营不及预期。	2022-10-23 08:31:09	东方财富Android版	y6772395963704458	2.9年	4	22941	66199	7
我笑了这主力也是神子。盘中给你绝望竞价给你希望。每天一拉	2022-10-24 15:01:48	东方财富iPhone版	m9068396061494432	2.5年	4	22942	66200	7
涨一天吧！就一天！	2022-10-24 10:32:06	东方财富Android版	y1765306184712310	2.1年	3	22942	66201	7
九转回肠形态，反弹在即，一触即发，加油	2022-10-25 13:19:14	东方财富Android版	i9131376377367106	1.5年	4	22943	66202	7
全新好：2022年前三季度净利润亏损893.34万元，上年同期亏损231.2万元	2022-10-25 19:06:06	股吧网页版	s2491125312925070	5年	10	22943	66203	7
今天会红	2022-10-25 09:47:31	东方财富Android版	i4649135463981162	4.5年	4	22943	66204	7
有没有可能明天突然来个涨停[偷笑]	2022-10-26 10:28:49	东方财富Android版	b9396355724976912	3.6年	4	22944	66205	7
改名叫没好吧？	2022-10-26 11:48:42	东方财富Android版	i4303375845877602	3.2年	4	22944	66206	7
本是同根生相煎何太急	2022-10-26 11:19:32	东方财富Android版	f9461145283493554	5年	4	22944	66207	7
开始尝试向上突破，关注！	2022-10-27 17:40:42	东方财富Android版	limx158168	13.3年	4	22945	66208	7
利好	2022-10-27 09:43:24	东方财富Android版	u9079355630621822	3.9年	2	22945	66209	7
洗筹结束稳步回升掐指一算原因，11月要出一波利好了。时间差不多了。准备装优质资产	2022-10-28 23:27:07	东方财富Android版	i9131376377367106	1.5年	4	22946	66210	7
庄股	2022-10-28 18:03:56	东方财富Android版	v1826084976733994	6年	6	22946	66211	7
居然没跌日啊	2022-10-28 18:02:32	东方财富Android版	v1826084976733994	6年	6	22946	66212	7
最好的避风港原来是你	2022-10-28 14:31:14	东方财富Android版	b2559355511527202	4.3年	4	22946	66213	7
买它	2022-10-28 14:18:15	东方财富Android版	f3953595174522376	5.4年	5	22946	66214	7
今天站上8块？	2022-10-28 09:56:14	东方财富Android版	b9396355724976912	3.6年	4	22946	66215	7
此股走势图上下影线特别多，庄股一个。	2022-10-30 10:40:21	股吧网页版	k4121396040353710	2.6年	5	22948	66216	7
今年无行情	2022-10-31 12:46:48	股吧网页版	ghz2013	10.2年	7	22949	66217	7
慢涨这么久，也该跌下来了吧	2022-10-31 09:58:56	股吧手机网页版	m6197094313278016	8.2年	5	22949	66218	7
筹码集中，股东人数少。拉升必备条件，看号码太低调了	2022-10-31 21:10:31	东方财富Android版	a8898326549098090	11个月	4	22949	66219	7
你怎么和大盘反着来[想一下]	2022-10-31 10:16:10	东方财富Android版	e8899326129229602	2.3年	6	22949	66220	7
7.95，你大爷，要跌停？。	2022-10-31 09:59:55	东方财富Android版	c1056336446458146	1.3年	4	22949	66221	7
看你今天往哪跑？终于等到你了哈哈	2022-10-31 09:29:44	东方财富Android版	o5789346426931928	1.4年	5	22949	66222	7
涨停板节奏开始了	2022-11-01 20:19:53	东方财富Android版	i4649135463981162	4.5年	4	22950	66223	7
大盘一个多点，板块是红的，这个是绿的，反骨仔啊	2022-11-01 13:50:17	东方财富Android版	k6922335628631626	3.9年	6	22950	66224	7
不知道明天还能等我上车吗？	2022-11-01 19:59:36	股吧网页版	z2037276521323120	1.1年	4	22950	66225	7
人气低迷的票子不能碰	2022-11-01 10:52:11	东方财富Android版	i2261396137071866	2.3年	4	22950	66226	7
明显不是我拉低了GDP，载入史册	2022-11-01 16:21:00	东方财富Android版	a8898326549098090	11个月	4	22950	66227	7
去球，终究是错付	2022-11-01 10:38:28	东方财富Android版	k6922335628631626	3.9年	6	22950	66228	7
11月1日建议在7.80元附近参与，跌破7元离场。近期行情回踩下方支撑位附近，随	2022-11-01 09:22:39	股吧网页版	u6255446667533048	7个月	5	22950	66229	7
000007（全新好）11月1日建议在7.80元附近参与，跌破7元离场。近期行情	2022-11-01 08:50:04	股吧网页版	e7202476667535904	7个月	4	22950	66230	7
垃圾一卖就大涨	2022-11-02 15:23:20	东方财富Android版	i2261396137071866	2.3年	4	22951	66231	7
对于僵尸股，不要留恋了，即使举牌了又能如何。短时间不会有任何起色的。留给底仓就好	2022-11-02 13:16:27	东方财富Android版	m6886094377214932	8年	7	22951	66232	7
168玩够了，也该下跌了吧	2022-11-02 13:35:08	东方财富Android版	f1814376250238862	1.9年	2	22951	66233	7
神奇的168。见到是缘分，进货吧！	2022-11-02 13:20:09	东方财富Android版	f8538486606274496	9个月	1	22951	66234	7
从此进入我的垃圾票列表	2022-11-02 09:42:46	东方财富Android版	i2261396137071866	2.3年	4	22951	66235	7
现在的情况是不是，主力和散户的资金是平起平坐的[偷笑]	2022-11-03 17:25:42	东方财富Android版	b9396355724976912	3.6年	4	22952	66236	7
这主力太精了谁买套谁	2022-11-03 12:17:45	东方财富Android版	i2261396137071866	2.3年	4	22952	66237	7
4.9再现，这是要玩完	2022-11-03 11:13:58	东方财富Android版	f1814376250238862	1.9年	2	22952	66238	7
这个垃圾早盘还勾引散户进场呢，你不拉两个涨停，散户是不会跟的。	2022-11-03 10:49:56	东方财富Android版	m6886094377214932	8年	7	22952	66239	7
好好的在这股里待着，现在哪个股都不稳，买了就大跌不信试试	2022-11-03 10:25:16	东方财富iPhone版	m8678406641697850	8个月	2	22952	66240	7
[上涨][上涨][上涨]	2022-11-03 09:03:17	东方财富Android版	m6876094317843194	8.2年	7	22952	66241	7
弱是弱了点，震荡上行就行[呲牙][呲牙][呲牙][呲牙][呲牙]	2022-11-04 11:26:46	东方财富Android版	b9396355724976912	3.6年	4	22953	66243	7
垃圾股，大盘几天大涨，这垃圾股，一天比一天缩量。	2022-11-04 13:26:51	东方财富Android版	m6886094377214932	8年	7	22953	66244	7
要下跌了	2022-11-04 12:34:56	东方财富Android版	m8294094450705834	7.7年	4	22953	66245	7
只要散户不傻，都不会再这个位置接盘。	2022-11-07 21:13:44	东方财富Android版	m6886094377214932	8年	7	22956	66246	7
厉害资金都被散户吃了	2022-11-07 15:04:57	东方财富Android版	m8294094450705834	7.7年	4	22956	66247	7
明天涨停，我已加仓50万，奶奶的，赌一把	2022-11-08 14:48:23	东方财富Android版	c2661085341548590	4.9年	4	22957	66248	7
维持第一目标位12元，加油[强壮]	2022-11-08 07:37:17	东方财富Android版	i9131376377367106	1.5年	4	22957	66249	7
一鼓作气，再创新高！	2022-11-08 17:47:52	东方财富Android版	i4649135463981162	4.5年	4	22957	66250	7
走了，真墨迹	2022-11-08 14:15:45	东方财富Android版	f1814376250238862	1.9年	2	22957	66251	7
关注已留下	2022-11-09 20:51:50	东方财富Android版	v1202436679970076	6个月	0	22958	66252	7
昨天加仓的50万，今天一顿割肉，收盘看账户，赚了不到200	2022-11-09 15:37:04	东方财富Android版	c2661085341548590	4.9年	4	22958	66253	7
估计得向下调整几天了	2022-11-10 17:57:48	东方财富Android版	b9396355724976912	3.6年	4	22959	66254	7
这样一杀，大部分都跑了	2022-11-10 09:51:21	东方财富Android版	x4264466603471128	9个月	3	22959	66255	7
等2天到8接回来	2022-11-10 11:36:08	东方财富Android版	c2661085341548590	4.9年	4	22959	66256	7
还好昨天忍痛割肉了	2022-11-10 11:35:47	东方财富Android版	c2661085341548590	4.9年	4	22959	66257	7
什么东西	2022-11-11 23:33:55	东方财富Android版	i4158346188771040	2.1年	2	22960	66258	7
还好50万早割肉了，要不然，亏大发了	2022-11-11 15:07:41	东方财富Android版	c2661085341548590	4.9年	4	22960	66259	7
求心里阴影面积	2022-11-11 14:17:49	东方财富iPhone版	k6220305994460826	2.8年	3	22960	66260	7
开始恶心人了，接盘的小散户现在是比吃了都难受。	2022-11-11 13:40:31	东方财富Android版	m6886094377214932	8年	7	22960	66261	7
什么垃圾	2022-11-11 13:33:58	东方财富Android版	u9079355630621822	3.9年	2	22960	66262	7
这股真好玩	2022-11-11 11:08:51	东方财富iPhone版	m9068396061494432	2.5年	4	22960	66263	7
整个板块就这个绿	2022-11-11 10:51:06	东方财富Android版	i4303375845877602	3.2年	4	22960	66264	7
绿油油	2022-11-11 10:16:53	东方财富Android版	i4649135463981162	4.5年	4	22960	66265	7
这就是全网找的跨年大妖股	2022-11-12 17:38:02	东方财富Android版	q4146396123621072	2.3年	3	22961	66266	7
这个股吧好安静，进来必定赚大钱！	2022-11-14 14:44:23	东方财富Android版	x7728376341951642	1.6年	3	22963	66267	7
事出反常必有妖！！！明天涨停。哈哈	2022-11-14 11:05:29	东方财富Android版	p4412356579652534	10个月	3	22963	66268	7
俺就叫全新，既然是全新好，那就找个时间进入看看。	2022-11-15 13:20:34	东方财富Android版	o9824365964371184	2.9年	2	22964	66269	7
干干干	2022-11-15 11:11:39	东方财富Android版	w8228316520642656	1.1年	1	22964	66270	7
又板块倒数第一	2022-11-15 11:01:28	东方财富Android版	i4303375845877602	3.2年	4	22964	66271	7
今天涨4个点	2022-11-16 09:43:34	东方财富Android版	i4649135463981162	4.5年	4	22965	66272	7
偷偷换[偷笑]	2022-11-16 11:07:36	东方财富Android版	b9396355724976912	3.6年	4	22965	66273	7
太弱	2022-11-18 10:34:56	东方财富Android版	i4649135463981162	4.5年	4	22967	66274	7
可以加一点了[偷笑]	2022-11-21 09:59:17	东方财富Android版	b9396355724976912	3.6年	4	22970	66275	7
玩来玩去还是8	2022-11-21 13:41:52	东方财富Android版	l4963396116251628	2.4年	4	22970	66276	7
周三涨7个点	2022-11-22 18:07:46	东方财富Android版	i4649135463981162	4.5年	4	22971	66277	7
$全新好(000007)$一支穿云箭，万马来相见	2022-11-22 10:12:03	东方财富Android版	i9131376377367106	1.5年	4	22971	66278	7
停牌也没通告一下	2022-11-23 09:26:53	东方财富Android版	b1436355574491144	4.1年	1	22972	66279	7
解释一下	2022-11-23 11:59:41	东方财富电脑版	b9396355724976912	3.6年	4	22972	66280	7
这么惨啊，都没人竞价了	2022-11-23 09:21:43	东方财富Android版	m6886094377214932	8年	7	22972	66281	7
最后拉起来什么意思	2022-11-24 15:08:17	东方财富Android版	n2941476624699344	8个月	2	22973	66282	7
还有谁有，大家成本多少？	2022-11-24 15:29:33	东方财富Android版	n2941476624699344	8个月	2	22973	66283	7
高位天天168168这不是吸引人接盘[呲牙][呲牙][呲牙][呲牙][呲牙]	2022-11-24 14:31:09	东方财富iPhone版	d1751205964618850	2.9年	2	22973	66284	7
什么玩意儿	2022-11-24 14:28:11	东方财富Android版	i4649135463981162	4.5年	4	22973	66285	7
小单买大单出没人接盘[呲牙][呲牙][呲牙]	2022-11-24 14:22:37	东方财富iPhone版	d1751205964618850	2.9年	2	22973	66286	7
算你狠	2022-11-24 09:43:54	东方财富Android版	d4985386135369698	2.3年	3	22973	66287	7
这盘咋回事每天都是大户和中户在拉扯一演演一天[哭][哭]	2022-11-24 09:36:47	东方财富Android版	p3352416656428258	7个月	1	22973	66288	7
明天大溢价，但没买就接盘了	2022-11-25 18:52:18	东方财富Android版	p2284406676230674	6个月	1	22974	66289	7
今天他又厉害了？	2022-11-25 14:55:31	东方财富Android版	n2941476624699344	8个月	2	22974	66290	7
你到底是什么呀跟什么	2022-11-25 10:04:35	东方财富iPhone版	j1610325792681952	3.4年	4	22974	66291	7
房地产借壳松绑是说你吧	2022-11-28 20:06:16	东方财富Android版	m5352023721711848	10.1年	9	22977	66292	7
07只能算个好壳。股权转让，大家才有机会喝点汤	2022-11-28 16:05:08	东方财富Android版	c3114266069182358	2.5年	5	22977	66293	7
完了	2022-11-28 14:52:13	东方财富iPhone版	h2739045326139796	4.9年	2	22977	66294	7
公司究竟发生了什么？？？	2022-11-29 14:19:11	东方财富Android版	p8111124684522696	7年	5	22978	66295	7
今天进的7.62能回本吗好怕第一次买这个股	2022-11-29 14:33:22	股吧手机网页版	d5713486686644884	6个月	2	22978	66296	7
房地产涨停潮，你是房地产股为啥不涨	2022-11-29 07:47:44	东方财富Android版	m8159094067139306	9年	5	22978	66297	7
实质利好，明天有上车机会吗	2022-11-29 20:55:47	东方财富Android版	s8668345997428648	2.8年	4	22978	66298	7
你不是有物业吗	2022-11-29 15:15:01	东方财富Android版	m1356094519755732	7.5年	3	22978	66299	7
买了几天，涨跌幅是我买过的股里面最小的，没意思，不用等回本，明天割肉走人，浪费时	2022-11-29 15:00:07	东方财富Android版	h9988305872721354	3.2年	3	22978	66300	7
爱拉[成交]	2022-11-29 20:50:01	东方财富Android版	y6791466673980416	6个月	0	22978	66301	7
把不坚定的全赶下了，主力有一套，玩得绝	2022-11-29 10:48:43	东方财富Android版	i9131376377367106	1.5年	4	22978	66302	7
有大利空不？	2022-11-29 14:33:47	东方财富Android版	i4158346188771040	2.1年	2	22978	66303	7
外面好股有的是！撤了！	2022-11-29 15:02:01	东方财富Android版	v7073336301237570	1.8年	4	22978	66304	7
跌这么多天了，是不是可以抄底了？	2022-11-29 14:53:09	东方财富Android版	m2822093916771292	9.4年	7	22978	66305	7
房地产板块唯一的一抹绿色！	2022-11-29 14:44:07	东方财富Android版	v7073336301237570	1.8年	4	22978	66307	7
远离此股	2022-11-29 14:21:34	东方财富Android版	i4649135463981162	4.5年	4	22978	66308	7
这桩没钱的弱庄，垃圾操盘手，玩猫腻	2022-11-29 14:20:02	东方财富iPhone版	d2921355551608136	4.2年	3	22978	66309	7
这股。。。。我才疏学浅看不懂	2022-11-29 14:17:05	东方财富iPhone版	q6673356229055436	2年	5	22978	66310	7
这操盘手儿	2022-11-29 14:00:25	东方财富Android版	i4649135463981162	4.5年	4	22978	66311	7
房地产板块涨幅7个多点，就这股倒数第一	2022-11-29 13:06:53	东方财富Android版	v7073336301237570	1.8年	4	22978	66312	7
就是少了一个国企改革不然也飞天	2022-11-29 12:29:54	东方财富iPhone版	z6941335763078762	3.5年	3	22978	66313	7
转发	2022-11-29 07:48:18	东方财富Android版	m8159094067139306	9年	5	22978	66314	7
7.58卖了200股，剩余6800股	2022-11-30 18:21:30	股吧网页版	m2380094488373352	7.6年	6	22979	66315	7
今天全用168，明天尽量用大点。效果明显些。量化	2022-11-30 19:35:33	东方财富Android版	c3114266069182358	2.5年	5	22979	66316	7
刚抛了，这货就蠢蠢欲动	2022-11-30 13:20:11	东方财富Android版	p8111124684522696	7年	5	22979	66318	7
站在风口，连猪都会飞，也就是说此庄连猪都。。。早就说过此庄无格局。不散去。先回头	2022-11-30 11:37:22	股吧网页版	i9154396009259924	2.7年	3	22979	66319	7
所在板块全红，唯07股份全绿，大盘上供，这二百五一个劲往地狱钻，有点意思	2022-11-30 10:35:52	东方财富Android版	p8111124684522696	7年	5	22979	66320	7
恶心死了，每天都是大单进还跌跌不休	2022-11-30 09:46:45	东方财富Android版	h9988305872721354	3.2年	3	22979	66321	7
下一个支撑点在6.2元，再一个支撑点在3.5元，之后不好判断了。退市与否不好说了	2022-12-01 10:57:32	东方财富Android版	u8387316001586646	2.7年	4	22980	66322	7
全新好庄家在大撤退吧！	2022-12-01 20:07:40	股吧手机网页版	v7141426698964106	5个月	2	22980	66323	7
大喊一声：“好人世界解禁了”	2022-12-01 19:54:13	东方财富Android版	m4499094392474264	7.9年	6	22980	66324	7
$全新好(SZ000007)$	2022-12-01 14:42:50	东方财富Android版	u8387316001586646	2.7年	4	22980	66325	7
已炼成九阴白骨爪	2022-12-01 14:06:53	东方财富Android版	j5218316284394620	1.8年	3	22980	66326	7
今天先考验7.3元支撑	2022-12-01 10:54:23	东方财富Android版	u8387316001586646	2.7年	4	22980	66327	7
7元能否企稳呀？否则万丈深渊	2022-12-01 10:52:05	东方财富Android版	u8387316001586646	2.7年	4	22980	66328	7
已经非st了为什么还是不能用信用账户交易，谁能告知一下	2022-12-02 10:55:09	东方财富iPhone版	i1962395508491838	4.3年	3	22981	66329	7
这股搞得举牌大哥无语了	2022-12-02 10:31:25	东方财富Android版	limx158168	13.3年	4	22981	66330	7
赚了100块，再见	2022-12-02 13:12:39	东方财富Android版	y4303075132619282	5.5年	4	22981	66331	7
你是龙头了今天	2022-12-02 10:05:57	东方财富Android版	t1031165658747578	3.8年	3	22981	66332	7
持续阴跌！这股没救了！！！	2022-12-02 09:58:41	东方财富Android版	v7073336301237570	1.8年	4	22981	66333	7
净资产为负，将是什么情况？	2022-12-02 07:15:56	东方财富Android版	u8387316001586646	2.7年	4	22981	66334	7
深振业说不是它	2022-12-05 09:31:59	东方财富电脑版	zj9188	11.7年	6	22984	66335	7
弄个涨停	2022-12-05 13:39:50	东方财富Android版	i4649135463981162	4.5年	4	22984	66336	7
有可能荣耀借壳，唯一没有绯闻的	2022-12-05 23:28:27	东方财富iPhone版	p4296336389698432	1.5年	2	22984	66337	7
改行织布卖吗？	2022-12-05 13:49:37	东方财富Android版	p3168346425820546	1.4年	3	22984	66338	7
卖了，今天又是织布机行情，	2022-12-05 11:48:00	股吧手机网页版	h1714305833079320	3.3年	4	22984	66339	7
你是来和我唱反调的吗[大笑]	2022-12-05 09:37:15	东方财富Android版	z2828356225564014	2年	4	22984	66340	7
满仓买入，与庄共舞[加油][加油]	2022-12-06 11:12:08	东方财富Android版	m4397466702544966	5个月	2	22985	66341	7
有被荣耀借壳上市吗？明天涨停就是真的了！！	2022-12-06 23:32:22	东方财富Android版	m7619093965269354	9.3年	5	22985	66342	7
新集能源虽然很尿性，但是其良好的性价比	2022-12-06 16:45:14	股吧网页版	m5366094396381982	7.9年	6	22985	66344	7
可惜了一波，挂单没买上[拜神][捂脸]	2022-12-06 13:17:32	东方财富Android版	zjg6262	11.6年	5	22985	66345	7
六年股本结构没有更新详情六年没有分红[哭]	2022-12-06 23:03:24	东方财富iPhone版	u2215014790895606	6.6年	4	22985	66346	7
干物业的压根不沾边	2022-12-06 21:24:46	东方财富Android版	u8387316001586646	2.7年	4	22985	66347	7
都说荣耀是说荣耀手机吗	2022-12-06 21:21:16	东方财富Android版	u8387316001586646	2.7年	4	22985	66348	7
深圳交易牌号000007这个比较符合荣耀的身份吧？荣耀借壳，真的有可能，无风不起	2022-12-06 20:54:48	东方财富Android版	i9131376377367106	1.5年	4	22985	66349	7
深圳市博恒投资有限公司为什么做为全新好的二股东，持股从2017年5月22日至今持	2022-12-06 17:57:44	东方财富Android版	m7086023770564102	9.9年	3	22985	66350	7
什么情况	2022-12-06 19:00:31	东方财富Android版	m9790094363258904	8年	4	22985	66351	7
涨停就在那里，不近不远，主力加油，晚上加鸡腿[加油][加油]	2022-12-06 14:04:45	东方财富Android版	m4397466702544966	5个月	2	22985	66352	7
小伙子，你悠着点，这样涨，你很危险	2022-12-06 13:13:28	东方财富Android版	c2661085341548590	4.9年	4	22985	66354	7
我看了去年退市风险提示，一下从9.4元跌到2.4元，今年是重演，2元是否不保	2022-12-07 17:25:16	东方财富Android版	u8387316001586646	2.7年	4	22986	66355	7
一群托在忽悠此股荣耀借壳，要是有或炒作都早涨停板了	2022-12-07 21:19:20	东方财富Android版	m4944094291545280	8.2年	5	22986	66356	7
请问，今年退市风险还存在吗？有懂得吗？	2022-12-07 17:20:58	东方财富Android版	u8387316001586646	2.7年	4	22986	66357	7
很好的题材荣耀借壳	2022-12-07 20:04:27	东方财富iPhone版	f7302346102946440	2.4年	3	22986	66358	7
三天后在来	2022-12-07 14:01:47	东方财富Android版	j8527336230285778	2年	3	22986	66359	7
还好走了真lj	2022-12-07 13:50:34	股吧网页版	m2461094488489458	7.6年	6	22986	66360	7
大哥，不能只硬一天呀，至少干3天吧！	2022-12-07 11:53:06	东方财富Android版	m4397466702544966	5个月	2	22986	66361	7
清仓了 再见	2022-12-07 11:23:57	股吧网页版	m2461094488489458	7.6年	6	22986	66362	7
今天不玩织布机了，今天玩红绿灯	2022-12-07 10:32:40	东方财富iPhone版	q1040436601890472	9个月	1	22986	66363	7
抓紧上车	2022-12-08 11:33:31	东方财富Android版	p6202376044677968	2.6年	3	22987	66364	7
明天破9见高点，8.88收盘。	2022-12-08 18:15:16	东方财富Android版	i4649135463981162	4.5年	4	22987	66365	7
这尿性明天准跌的	2022-12-08 14:54:27	东方财富Android版	b2559355511527202	4.3年	4	22987	66366	7
这个走势可以了	2022-12-08 14:45:00	东方财富Android版	i3258306281438582	1.8年	4	22987	66367	7
全新国际荣耀总公司	2022-12-08 14:14:40	东方财富Android版	m6505094069059428	9年	4	22987	66368	7
跑步进场，房地产服务板块补涨也得30%，10块不见不散[色][色]	2022-12-08 11:52:06	东方财富Android版	m4397466702544966	5个月	2	22987	66369	7
不可能退市！	2022-12-08 10:05:10	东方财富Android版	i2044416629870670	8个月	2	22987	66370	7
为什么一直有人刷168，168什么意思	2022-12-09 10:20:15	东方财富iPhone版	k1650386262449262	1.9年	4	22988	66371	7
大	2022-12-09 23:33:46	东方财富iPhone版	y2836335789778770	3.4年	2	22988	66372	7
没人气公告都没看	2022-12-09 22:45:39	东方财富iPhone版	h5747336254579560	1.9年	6	22988	66373	7
算是看透你了，涨一天歇一天，今天低位买入，周一5个点起步[加油][加油]	2022-12-09 10:09:35	东方财富Android版	m4397466702544966	5个月	2	22988	66374	7
这个股没人看得上[大笑]	2022-12-09 09:44:59	东方财富Android版	l3715335819934482	3.3年	4	22988	66375	7
不是荣耀，是大疆创新科技	2022-12-12 11:28:16	东方财富Android版	i9131376377367106	1.5年	4	22991	66377	7
这个票已经没有流动性可言了，散户机会不参与了。日线，周线级别都不适用了，现在只能	2022-12-12 13:22:36	东方财富Android版	m6886094377214932	8年	7	22991	66378	7
星期五的公告不是利好吗？	2022-12-12 12:27:48	东方财富Android版	p3168346425820546	1.4年	3	22991	66379	7
8.23走完了，7.8再捡回来	2022-12-13 11:31:21	东方财富Android版	c2661085341548590	4.9年	4	22992	66380	7
我先撤了	2022-12-13 10:40:51	东方财富Android版	u8387316001586646	2.7年	4	22992	66381	7
有人知道来龙去脉吗？	2022-12-14 20:39:25	股吧网页版	c8026515233444574	5.2年	3	22993	66382	7
再涨点，俺就卖	2022-12-15 14:56:03	东方财富Android版	v6168336547776226	11个月	1	22994	66383	7
[赞][赞][赞]	2022-12-15 19:33:23	东方财富Android版	wxy111111	10.9年	1	22994	66384	7
自从买了它，真它不踏实	2022-12-15 13:41:43	东方财富Android版	u8387316001586646	2.7年	4	22994	66385	7
稳还是你稳啊[笑哭]	2022-12-16 10:08:23	东方财富Android版	b9396355724976912	3.6年	4	22995	66386	7
这一波调整能否击穿6.5元，拭目以待吧	2022-12-19 14:10:05	东方财富Android版	u8387316001586646	2.7年	4	22998	66387	7
感觉要破位了	2022-12-19 13:35:49	东方财富Android版	u8387316001586646	2.7年	4	22998	66389	7
不错，没跌停哈	2022-12-19 13:31:10	东方财富Android版	u8387316001586646	2.7年	4	22998	66390	7
今天的十字星是不是下跌中继，有懂得吗？赐教了！	2022-12-20 22:51:56	东方财富Android版	u8387316001586646	2.7年	4	22999	66391	7
今晚出不出公告啊	2022-12-20 16:55:47	东方财富Android版	c2661085341548590	4.9年	4	22999	66392	7
这么多的股票怎么深交所就跟他过不去呀	2022-12-21 15:10:06	东方财富Android版	u8387316001586646	2.7年	4	23000	66393	7
是否到了生死狙击的时候了，我要出手	2022-12-21 21:07:21	东方财富Android版	u8387316001586646	2.7年	4	23000	66394	7
最好出逃的机会	2022-12-21 14:30:25	东方财富Android版	u8387316001586646	2.7年	4	23000	66395	7
就怕刚要看好又跌了，	2022-12-21 11:25:12	东方财富Android版	u8387316001586646	2.7年	4	23000	66396	7
昨天的恢复当成了利好了	2022-12-21 11:04:09	东方财富Android版	u8387316001586646	2.7年	4	23000	66397	7
什么情况，咋涨了？	2022-12-21 10:58:37	东方财富Android版	u8387316001586646	2.7年	4	23000	66398	7
剁手哇，7.76又满仓了	2022-12-22 14:17:04	东方财富Android版	u8387316001586646	2.7年	4	23001	66399	7
下方有大单，必跌穿	2022-12-22 09:47:12	东方财富Android版	u8387316001586646	2.7年	4	23001	66400	7
今年认赌服输了	2022-12-22 13:09:02	东方财富Android版	u8387316001586646	2.7年	4	23001	66401	7
，清仓了，不玩了	2022-12-22 13:07:07	东方财富Android版	u8387316001586646	2.7年	4	23001	66402	7
什么情况？	2022-12-22 13:06:37	东方财富Android版	p3168346425820546	1.4年	3	23001	66403	7
重磅！时隔12年证监会重启房企借壳上市大门，这算利好吗	2022-12-22 09:15:56	东方财富Android版	u8387316001586646	2.7年	4	23001	66404	7
早点了吧，刚两点半呀	2022-12-23 14:33:00	东方财富Android版	u8387316001586646	2.7年	4	23002	66405	7
今天不再创新低就是最好的结果，最好收盘在7.75	2022-12-23 14:22:05	东方财富Android版	u8387316001586646	2.7年	4	23002	66406	7
我感觉有些人是不是。天天高买低卖。钱多多啊，你再多也没人跟你。	2022-12-23 13:11:22	东方财富Android版	y6772395963704458	2.9年	4	23002	66407	7
特斯拉大跌9%，吓人吗？	2022-12-23 09:23:47	东方财富Android版	u8387316001586646	2.7年	4	23002	66408	7
现在这个股，就等着判决书，哈哈哈。	2022-12-26 10:03:34	东方财富Android版	m6886094377214932	8年	7	23005	66409	7
月线是否来阳线，拭目以待	2022-12-26 13:15:31	东方财富Android版	u8387316001586646	2.7年	4	23005	66410	7
不会炒股，只能参考老张观点	2022-12-27 20:36:39	东方财富Android版	wxy111111	10.9年	1	23006	66411	7
远离	2022-12-27 11:11:29	东方财富Android版	i4649135463981162	4.5年	4	23006	66412	7
看看周线月线级别的均线，走的跟一样，一个圆弧顶。你说能涨吗。还进吗，各位散户	2022-12-27 10:57:52	东方财富Android版	m6886094377214932	8年	7	23006	66413	7
7.5元岌岌可危	2022-12-27 10:40:10	东方财富Android版	u8387316001586646	2.7年	4	23006	66414	7
有道理支持	2022-12-27 09:20:43	东方财富Android版	wxy111111	10.9年	1	23006	66415	7
7.8全部挂单卖出	2022-12-28 14:42:07	东方财富Android版	u8387316001586646	2.7年	4	23007	66416	7
再挂7.79	2022-12-28 14:45:44	东方财富Android版	u8387316001586646	2.7年	4	23007	66417	7
抄底全仓	2022-12-28 09:10:48	东方财富Android版	w1850366267036264	1.9年	2	23007	66418	7
难道今天不回复问询函了？？	2022-12-29 20:25:06	东方财富iPhone版	q7746316285044994	1.8年	1	23008	66419	7
大盘预判上证指数周四低开高走，盘中始终是水下震荡为主，上证50一度跌逾1%，也表	2022-12-29 20:12:46	东方财富Android版	g4359336448267352	1.3年	5	23008	66420	7
看来还得收个阴十字星	2022-12-30 14:41:27	东方财富Android版	u8387316001586646	2.7年	4	23009	66422	7
从7.77开始拐拐拐	2022-12-30 14:27:32	东方财富Android版	u8387316001586646	2.7年	4	23009	66423	7
别追高，小心剁手	2022-12-30 14:17:41	东方财富Android版	u8387316001586646	2.7年	4	23009	66424	7
上午的量太小了，都放弃了吗？	2022-12-30 13:25:22	东方财富Android版	u8387316001586646	2.7年	4	23009	66425	7
你到底是属于房地产行业还是商业	2022-12-30 13:04:31	东方财富Android版	u8387316001586646	2.7年	4	23009	66426	7
幸亏清仓了，节后可以躲过一劫	2022-12-31 11:23:26	东方财富Android版	u8387316001586646	2.7年	4	23010	66427	7
啥情况?	2023-01-03 13:25:44	东方财富Android版	u8387316001586646	2.7年	4	23013	66428	7
我在7.8元等你	2023-01-04 13:56:32	东方财富Android版	u8387316001586646	2.7年	4	23014	66429	7
太不要脸了	2023-01-04 13:55:32	东方财富Android版	p3168346425820546	1.4年	3	23014	66430	7
今天能否跌停?	2023-01-04 13:07:21	东方财富Android版	u8387316001586646	2.7年	4	23014	66431	7
大单托着也没人建仓了吗？	2023-01-05 14:28:51	东方财富Android版	u8387316001586646	2.7年	4	23015	66432	7
量能降到近两个月低点	2023-01-05 14:06:48	东方财富Android版	u8387316001586646	2.7年	4	23015	66433	7
出来了。你个不争气的东西。	2023-01-05 10:48:59	东方财富Android版	y6772395963704458	2.9年	4	23015	66434	7
高点一个比一个低，让人心里不踏实	2023-01-05 10:45:13	东方财富Android版	u8387316001586646	2.7年	4	23015	66435	7
下面挂大单，支撑必击穿	2023-01-05 09:55:44	东方财富Android版	u8387316001586646	2.7年	4	23015	66436	7
先进半仓，买600股	2023-01-05 09:36:51	东方财富Android版	u8387316001586646	2.7年	4	23015	66437	7
静等你破7.5元	2023-01-06 10:37:28	东方财富Android版	u8387316001586646	2.7年	4	23016	66438	7
不要接刀	2023-01-06 13:18:13	东方财富Android版	u8387316001586646	2.7年	4	23016	66439	7
[大笑]前几天加早了7.9加的，不然今天7.95可以出了，等吧8.15应该有机会	2023-01-09 15:11:31	东方财富Android版	b9396355724976912	3.6年	4	23019	66440	7
犯神经了	2023-01-09 14:19:21	东方财富Android版	u8387316001586646	2.7年	4	23019	66441	7
更新即来	2023-01-10 22:49:41	东方财富Android版	wxy111111	10.9年	1	23020	66442	7
应该会跟风好上好	2023-01-10 09:41:36	东方财富Android版	d6919366405730020	1.4年	4	23020	66443	7
平手清仓了	2023-01-11 14:44:42	东方财富Android版	u8387316001586646	2.7年	4	23021	66444	7
年底了，这个位置加也好，不加也好，最好还是不要动了，年后再找位置，过年要紧[大笑	2023-01-13 11:42:18	东方财富Android版	b9396355724976912	3.6年	4	23023	66445	7
主力提前回家过年咯[困顿][困顿]	2023-01-13 11:52:45	东方财富Android版	m4397466702544966	5个月	2	23023	66446	7
这股半天没人说话，那是谁在买卖[哼]	2023-01-13 11:37:18	东方财富iPhone版	v6958356146761848	2.3年	4	23023	66447	7
中短线走坏，年线被击穿，凶多吉少！	2023-01-16 14:48:57	东方财富Android版	u8387316001586646	2.7年	4	23026	66448	7
什么情况	2023-01-16 14:36:15	东方财富Android版	z2828356225564014	2年	4	23026	66449	7
赶紧跑，赶紧跑，赶紧跑，重要事说三遍	2023-01-16 14:35:18	东方财富Android版	u8387316001586646	2.7年	4	23026	66450	7
垃圾	2023-01-16 14:34:41	东方财富Android版	i4649135463981162	4.5年	4	23026	66451	7
日线、周线级别的均线开始向下发散了，看来又要暴跌了。	2023-01-16 11:44:55	东方财富Android版	m6886094377214932	8年	7	23026	66452	7
春节前跌至6元	2023-01-16 09:33:58	东方财富Android版	i4649135463981162	4.5年	4	23026	66453	7
这东西，应改成全心坏	2023-01-17 14:41:33	东方财富Android版	i4158346188771040	2.1年	2	23027	66454	7
腾讯突然退租，什么信号？16日晚间，上市公司朗科科技公告，受经济下行压力加剧，消	2023-01-17 09:54:04	东方财富Android版	u8387316001586646	2.7年	4	23027	66455	7
688169过了三月份就出头了！好股票总会有希望的	2023-01-17 00:40:05	东方财富Android版	wxy111111	10.9年	1	23027	66456	7
全新好：预计22年年度归母净利润同比下降75.23%至83.49%	2023-01-18 18:46:33	股吧网页版	g2368125312925060	5年	9	23028	66457	7
120哥出手了	2023-01-18 09:37:34	东方财富iPhone版	y3760396368138508	1.6年	2	23028	66458	7
，看来退市是早晚的事	2023-01-19 22:58:49	东方财富Android版	u8387316001586646	2.7年	4	23029	66459	7
习酒借壳泰永长征干嘛，要借也借全新好啊，市值又低，又保住壳了。007这个号码不比	2023-01-19 13:46:15	东方财富iPhone版	u8205335900491984	3.1年	2	23029	66461	7
日线级别破年线，就标志着要自由落体了。	2023-01-19 11:38:05	东方财富Android版	m6886094377214932	8年	7	23029	66462	7
我这人心善，又买点新好	2023-01-19 10:10:04	东方财富Android版	u8387316001586646	2.7年	4	23029	66464	7
有没有小伙伴成功地卖在了最低点…	2023-01-20 10:20:44	东方财富Android版	m4397466702544966	5个月	2	23030	66465	7
2021年退市风险提示从9.5元跌到2.5元，今年退市风险提示能否跌到1元，期待	2023-01-20 10:54:01	东方财富Android版	u8387316001586646	2.7年	4	23030	66468	7
垃圾	2023-01-20 09:50:10	东方财富Android版	l2922346557993856	11个月	2	23030	66469	7
此股死了，没得救了！	2023-01-30 19:55:18	股吧手机网页版	v7141426698964106	5个月	2	23040	66470	7
都去吃饭吗，人都哪去了	2023-01-30 10:59:20	东方财富Android版	c5233346128518510	2.3年	3	23040	66471	7
沙壁飞舞	2023-01-30 09:58:29	东方财富Android版	m2360094326489888	8.1年	4	23040	66472	7
次垃圾股补涨，大盘该调整了吧？	2023-01-31 14:13:17	东方财富Android版	u8387316001586646	2.7年	4	23041	66473	7
没得救	2023-01-31 09:43:29	东方财富Android版	l2922346557993856	11个月	2	23041	66474	7
此股退市节奏加快了！？证监会就全面实行股票发行注册制主要制度规则向社会公开征求意	2023-02-01 17:37:51	东方财富Android版	u8387316001586646	2.7年	4	23042	66475	7
上涨不代表退市风险提示解除，至少不会在2023年4月底前公告	2023-02-01 14:54:18	东方财富Android版	u8387316001586646	2.7年	4	23042	66476	7
$全新好(SZ000007)$	2023-02-01 09:44:48	东方财富Android版	w4547316104951574	2.4年	3	23042	66478	7
板块全红，全新好股价翻绿，啥意思？？？[可怜][可怜][可怜]	2023-02-02 15:04:22	东方财富Android版	p8111124684522696	7年	5	23043	66479	7
无药可救了	2023-02-02 09:39:07	东方财富Android版	i4158346188771040	2.1年	2	23043	66480	7
快。延期公告撂出来了吧！	2023-02-03 16:54:50	东方财富Android版	y6772395963704458	2.9年	4	23044	66481	7
代码000007，代码就值700亿，至少20倍起步。	2023-02-04 10:30:40	东方财富Android版	a3216476635707878	8个月	7	23045	66482	7
主力会玩，股票上涨资金一直在流出！	2023-02-06 13:38:09	东方财富电脑版	m9506094882555460	6.3年	8	23047	66483	7
主力会玩，玩死自己那种玩法！	2023-02-07 11:00:37	东方财富电脑版	m9506094882555460	6.3年	8	23048	66484	7
很高，终于要退市了	2023-02-08 20:59:31	东方财富Android版	c2661085341548590	4.9年	4	23049	66485	7
没了成交量，是否该暴跌呀？	2023-02-09 20:41:28	东方财富Android版	u8387316001586646	2.7年	4	23050	66486	7
请问退市风险提示后多长时间正式退市，有过度期吗？	2023-02-09 14:52:34	东方财富Android版	u8387316001586646	2.7年	4	23050	66487	7
怎么关注函的回复还没出，不是昨晚就应该出来吗？	2023-02-09 09:51:28	东方财富Android版	t8489625188463754	5.4年	2	23050	66488	7
好文章	2023-02-09 09:15:31	东方财富Android版	p5378456698162694	5个月	2	23050	66489	7
喜欢你的名字，但是房地产，最近都没啥行情，还是再看看吧。	2023-02-10 12:53:07	东方财富Android版	f1037386057028886	2.6年	6	23051	66490	7
被遗忘的角落	2023-02-11 05:36:49	东方财富Android版	i4158346188771040	2.1年	2	23052	66491	7
敢删我贴！	2023-02-14 08:42:42	东方财富Android版	y6772395963704458	2.9年	4	23055	66493	7
没有成交量，都快成僵尸股了，会是黎明前的静悄悄么？	2023-02-14 14:34:32	东方财富Android版	m4397466702544966	5个月	2	23055	66494	7
今天会红	2023-02-14 09:03:22	东方财富Android版	i4158346188771040	2.1年	2	23055	66495	7
好的很额多，一起吧	2023-02-16 19:35:23	东方财富Android版	q5420416703265842	5个月	3	23057	66496	7
你也跟大盘吗[呲牙]再翻个红，大家开心下	2023-02-16 14:40:25	东方财富Android版	b9396355724976912	3.6年	4	23057	66497	7
还好跑了，最近会大跌，空头排列，多周期均线双死	2023-02-16 09:30:26	东方财富Android版	c2661085341548590	4.9年	4	23057	66498	7
请问这是呼伦贝尔大草原吗	2023-02-17 20:46:13	东方财富电脑版	d6946356509815750	1.1年	4	23058	66499	7
说一点自己和朋友的体会，可能有关，也可能无关，与大家分享，和大家共勉。股市操作多	2023-02-20 08:29:16	东方财富Android版	x4067396095840272	2.4年	5	23061	66500	7
侃侃	2023-02-20 12:51:32	东方财富电脑版	q8053356405888970	1.4年	1	23061	66501	7
我坚信深圳人的智慧	2023-02-21 14:32:50	东方财富Android版	u8387316001586646	2.7年	4	23062	66502	7
挺好的壳，为啥不涨，难道真的会退市?	2023-02-21 14:29:46	东方财富Android版	u8387316001586646	2.7年	4	23062	66503	7
死股	2023-02-21 11:30:58	东方财富Android版	i4158346188771040	2.1年	2	23062	66504	7
泛力	2023-02-21 09:37:27	东方财富Android版	i4158346188771040	2.1年	2	23062	66505	7
你们是虫子	2023-02-23 18:28:09	股吧网页版	s1592014513999474	7.5年	6	23064	66506	7
这是大笑话，里面肯定有天机！	2023-02-26 14:42:15	股吧手机网页版	v7141426698964106	5个月	2	23067	66508	7
笑掉牙的事，肯定暗藏天机！	2023-02-26 14:44:06	股吧手机网页版	v7141426698964106	5个月	2	23067	66509	7
好的还是很多的	2023-02-27 20:49:00	东方财富Android版	m9684396206465220	2.1年	6	23068	66510	7
慢慢等你波动小不加不减[偷笑]	2023-03-01 14:53:04	东方财富Android版	b9396355724976912	3.6年	4	23070	66512	7
全市场最烂的股票！	2023-03-01 14:46:54	东方财富Android版	i2044416629870670	8个月	2	23070	66513	7
7.83元是个坎，能过吗？	2023-03-02 19:32:10	股吧网页版	zmdt	15.6年	4	23071	66514	7
僵尸[加油][加油]	2023-03-03 13:51:27	东方财富Android版	f9461145283493554	5年	4	23072	66515	7
007混的真惨	2023-03-03 14:37:27	东方财富Android版	d7919446641216720	8个月	4	23072	66516	7
没量没人气	2023-03-08 16:19:47	东方财富Android版	v9155395537548372	4.2年	3	23077	66517	7
今天出利好，下周开始板	2023-03-10 16:23:39	东方财富Android版	c2661085341548590	4.9年	4	23079	66518	7
万万没想到，手中竟然是你红的。[大笑]，准备阴跌几天呢。	2023-03-10 15:47:54	东方财富Android版	b9396355724976912	3.6年	4	23079	66519	7
涨一天，又可以跌五天了。尿性。	2023-03-10 15:24:46	东方财富Android版	m6886094377214932	8年	7	23079	66520	7
看好你	2023-03-11 15:51:30	东方财富iPhone版	z4881395867777076	3.2年	2	23080	66521	7
政策性利好	2023-03-13 13:39:18	股吧手机网页版	k2304375713751978	3.7年	6	23082	66522	7
主力已经严重控盘了	2023-03-13 01:01:09	东方财富Android版	l9901416611862824	9个月	2	23082	66524	7
不死不活	2023-03-15 14:13:36	东方财富Android版	i4158346188771040	2.1年	2	23084	66525	7
我比王可欣持股还多几万股，为什么不与我签协议，请限愚人节之前恢复我	2023-03-16 07:26:01	东方财富Android版	u8387316001586646	2.7年	4	23085	66526	7
滑稽可笑的事，怎么恢复	2023-03-16 07:20:05	东方财富Android版	u8387316001586646	2.7年	4	23085	66527	7
这个股真的好奇怪，大盘大涨，它就跌，大盘跌，它倒有可能会涨。	2023-03-17 13:32:11	东方财富Android版	i4158346188771040	2.1年	2	23086	66530	7
目前二股东解除限售的条件已经具备，后续应该会尽快推动此事，同时考虑二股东买入成本	2023-03-21 23:44:55	东方财富Android版	u1683355725769722	3.6年	1	23090	66533	7
这庄股已经失去上升动力，吸引不了散户，没戏	2023-03-22 14:09:56	东方财富Android版	b2559355511527202	4.3年	4	23091	66534	7
攻。攻。横14年天地量逆攻，银座股份黄金坑双金针鸭头。周线冒烟。月线堆量黄金坑信	2023-03-27 10:00:09	股吧网页版	y4653486625584644	8个月	5	23096	66536	7
什么玩意，怂b	2023-03-27 15:27:58	东方财富电脑版	q8053356405888970	1.4年	1	23096	66537	7
好的还是很多的	2023-03-27 23:03:30	东方财富Android版	k6327466770682534	3个月	2	23096	66538	7
未来可期？	2023-03-27 09:26:57	东方财富Android版	m8268094100995436	8.8年	5	23096	66540	7
[666]股价没涨，关注函一个接一个的来。	2023-03-28 09:58:32	东方财富Android版	b9396355724976912	3.6年	4	23097	66541	7
你梭哈了吗？～～嘎嘎嘎	2023-03-29 14:49:24	股吧网页版	b2379075436303464	4.6年	8	23098	66542	7
真是垃圾股	2023-03-29 03:57:03	东方财富Android版	n7157365888324592	3.1年	4	23098	66543	7
跌了一周了	2023-03-30 12:03:59	东方财富Android版	o2792356182860616	2.2年	3	23099	66544	7
蓄势待发	2023-04-03 13:13:12	东方财富Android版	i4158346188771040	2.1年	2	23103	66545	7
看好你	2023-04-04 10:11:51	东方财富电脑版	b9396355724976912	3.6年	4	23104	66546	7
完了来晚了	2023-04-05 06:48:46	东方财富Android版	k2046315525363562	4.3年	3	23105	66547	7
还不超底，等还何时？	2023-04-07 13:41:45	东方财富电脑版	z1070166787818730	2个月	2	23107	66548	7
消息配合老鼠韭菜散户，不断在市场上发着暧昧的消息，让散户浮想联翩，祝坚守的各位安	2023-04-07 14:58:00	股吧网页版	i9154396009259924	2.7年	3	23107	66549	7
东方明珠的塔尖尖	2023-04-07 14:43:41	东方财富Android版	i4158346188771040	2.1年	2	23107	66550	7
死了算了000007	2023-04-11 13:12:45	东方财富Android版	i4158346188771040	2.1年	2	23111	66551	7
Nnd	2023-04-12 17:59:28	东方财富Android版	i3470305935651742	2.9年	3	23112	66552	7
全新好的春意很足[大笑]	2023-04-12 09:29:53	东方财富Android版	i4158346188771040	2.1年	2	23112	66553	7
大家快看。。。。这里在耍猴	2023-04-14 09:19:04	股吧网页版	q9342385712798376	3.7年	6	23114	66554	7
直接砸跌停，接着10个一字跌停板，就小庄你敢不敢。	2023-04-18 13:56:13	东方财富Android版	m6886094377214932	8年	7	23118	66555	7
明日起，开始杀猪猪盘	2023-04-19 21:50:14	东方财富Android版	n5687355783185948	3.4年	6	23119	66556	7
年报亏损，重回ST	2023-04-19 15:03:06	东方财富Android版	g3236386086208350	2.5年	4	23119	66557	7
大家看看，像不像之前那一波一字跌停板的前奏。哈哈哈	2023-04-19 14:23:36	东方财富Android版	m6886094377214932	8年	7	23119	66558	7
仔细看看，日线、周线的均线全部开始向下发散，即将形成俯冲态势。现在就等年报了公布	2023-04-19 10:48:59	东方财富Android版	m6886094377214932	8年	7	23119	66559	7
站稳了，抄底的机会	2023-04-20 13:35:06	东方财富Android版	b2559355511527202	4.3年	4	23120	66560	7
跌停吧，阿西吧，我好来抄底	2023-04-20 10:39:41	东方财富Android版	g3236386086208350	2.5年	4	23120	66561	7
砸盘的意义就是年报亏损，啦	2023-04-20 10:36:21	东方财富Android版	g3236386086208350	2.5年	4	23120	66562	7
你这种砸盘法，莫不是汉服控股不太同意二股东的方案，老二恼羞成怒联系私募基金砸盘了	2023-04-20 10:20:03	东方财富Android版	m6886094377214932	8年	7	23120	66563	7
开始瀑布了，散户注意风险。	2023-04-20 10:16:52	东方财富Android版	m6886094377214932	8年	7	23120	66564	7
百日维新低，坚守的安好。此公司已废[微笑]	2023-04-21 13:27:46	股吧网页版	i9154396009259924	2.7年	3	23121	66565	7
有没有到底，我准备抄底了	2023-04-21 18:45:28	东方财富Android版	g3236386086208350	2.5年	4	23121	66566	7
无量下跌，深不见底。	2023-04-21 14:35:26	东方财富Android版	m6886094377214932	8年	7	23121	66567	7
没有人接盘，出货都顺畅，几千就能砸跌停。也难为出货之人了。事实证明，以后小盘僵尸	2023-04-21 09:38:29	东方财富Android版	m6886094377214932	8年	7	23121	66568	7
6块55开始好抄底了，准备回拉，本周一飞冲天[上涨][看多][主力][国家队][	2023-04-24 14:01:02	东方财富Android版	i9131376377367106	1.5年	4	23124	66569	7
明天大涨了	2023-04-24 18:13:51	东方财富Android版	d1471446803336582	1个月	2	23124	66570	7
左边跟我画个龙，右边再画个虫我呸	2023-04-24 10:22:15	股吧网页版	e2560476661462416	7个月	2	23124	66571	7
左边跟我一起画个龙，右边再画个虫！呸垃圾	2023-04-24 10:21:46	股吧网页版	e2560476661462416	7个月	2	23124	66572	7
慢慢数，至少十根阴线，一根大概3个点，慢慢熬吧。	2023-04-25 10:15:49	东方财富Android版	m6886094377214932	8年	7	23125	66573	7
恐慌跌停压单从8万多手减到3万多手了，开板有望	2023-04-27 13:26:46	东方财富Android版	i9131376377367106	1.5年	4	23127	66574	7
年报巨亏，大户开始逃跑了。二进宫，再带帽。上一波带帽股价从8.6元一直跌倒2.4	2023-04-27 10:22:17	东方财富Android版	m6886094377214932	8年	7	23127	66575	7
几千单的谁在买	2023-04-27 14:29:13	东方财富Android版	g3236386086208350	2.5年	4	23127	66576	7
真的是有点觉得人心是最不可给信任的东西	2023-04-27 10:31:47	东方财富iPhone版	w8990325930108448	3年	2	23127	66577	7
看不懂为什么跌停	2023-04-27 16:29:04	东方财富iPhone版	j9751345725086746	3.6年	5	23127	66578	7
全新好股价创近1年新低	2023-04-27 15:42:50	股吧网页版	i2635125312925094	5年	8	23127	66579	7
都是撤单，搞不得，进就是冤种[滴汗]	2023-04-27 14:01:05	东方财富Android版	r6239326191460884	2.1年	6	23127	66580	7
全新好明日大涨	2023-04-27 10:31:22	东方财富iPhone版	m6303305894375914	3.1年	4	23127	66581	7
快开榜了，赶紧抄底	2023-04-27 13:24:35	东方财富Android版	b2559355511527202	4.3年	4	23127	66582	7
嘛滴个老毕推迟一天是给主力庄家逃跑的吗？	2023-04-27 13:16:55	东方财富Android版	p9175145413194582	4.6年	3	23127	66583	7
这次是要退市吗？	2023-04-27 11:15:30	东方财富Android版	u8387316001586646	2.7年	4	23127	66584	7
想要变好就别挂卖单，一切都会好的	2023-04-27 10:41:41	东方财富iPhone版	w8990325930108448	3年	2	23127	66586	7
庄股特色	2023-04-27 10:27:51	东方财富Android版	m6373094116510470	8.8年	2	23127	66587	7
哈哈哈，开始数板了	2023-04-27 09:50:27	东方财富Android版	m6886094377214932	8年	7	23127	66588	7
SZ000007将成为过去式。	2023-04-27 10:26:34	东方财富Android版	k9531346222406978	2年	6	23127	66589	7
这票什么情况》？？？	2023-04-27 10:10:40	东方财富电脑版	k9403104579447090	7.3年	4	23127	66590	7
改名:无老坏	2023-04-27 10:08:22	东方财富Android版	m9913094485882142	7.6年	4	23127	66591	7
真他凉的，山上风冷，下探绿树浓荫	2023-04-27 09:55:09	东方财富iPhone版	b3551306043896640	2.6年	1	23127	66592	7
准备退市了。	2023-04-27 09:50:24	东方财富Android版	k9531346222406978	2年	6	23127	66593	7
今晚出年报，节后停牌一天→*ST全新	2023-04-28 10:07:22	东方财富Android版	m4474094239129244	8.4年	7	23128	66594	7
去年三季度已公布营业收入19390.82万元，净利润这前段时间又有业绩预告，66	2023-04-28 00:38:27	东方财富iPhone版	w8990325930108448	3年	2	23128	66595	7
审计员还在加班吗[大笑]	2023-04-28 21:19:09	东方财富iPhone版	b3551306043896640	2.6年	1	23128	66596	7
今天不出年报[为什么]	2023-04-28 21:17:10	东方财富Android版	g3236386086208350	2.5年	4	23128	66597	7
上了老鼠仓的当。被骗了	2023-04-28 21:05:36	东方财富Android版	i3470305935651742	2.9年	3	23128	66598	7
必须明白全新好与房地产开发具体到底是一种怎么样的存在，其中问题的关键究竟为何?像	2023-04-28 18:35:44	东方财富iPhone版	p9222346106129394	2.4年	7	23128	66599	7
年报，季报出来了。快看。	2023-04-28 18:39:00	东方财富Android版	i3470305935651742	2.9年	3	23128	66601	7
加仓控股	2023-04-28 17:51:19	东方财富Android版	w6156365827539218	3.3年	2	23128	66602	7
杀猪盘	2023-04-28 17:48:17	东方财富Android版	y2378114672753930	7年	6	23128	66603	7
这就是故意打压筹码退个毛线市[大笑][微笑]骗散户下车然后把筹码接回来。	2023-04-28 11:24:03	东方财富Android版	p2498496769292676	3个月	2	23128	66604	7
1.5个亿封板，这是疯了吗	2023-04-28 13:27:38	东方财富Android版	g3236386086208350	2.5年	4	23128	66605	7
内部消息	2023-04-28 16:44:04	股吧网页版	l8013376208078874	2.1年	3	23128	66606	7
全新好一字跌停 一机构买入178万元	2023-04-28 16:44:35	股吧网页版	i2635125312925094	5年	8	23128	66607	7
出公告了，业绩没有问题！！！担心多余了。真狠庄家。	2023-04-28 16:25:30	东方财富Android版	i3470305935651742	2.9年	3	23128	66608	7
今天出年报还是明天	2023-04-28 16:12:24	东方财富Android版	g3236386086208350	2.5年	4	23128	66609	7
买的筹码被谁吃去了？被庄家吗？	2023-04-28 09:40:11	东方财富Android版	k9531346222406978	2年	6	23128	66610	7
恐慌，盘面。又不是退市，也再次证明了赌借壳，并购的风险。也许，风雨过后是彩虹。	2023-04-28 14:01:02	东方财富Android版	s2870054832880776	6.5年	2	23128	66611	7
有没有人卖出去的	2023-04-28 13:04:47	东方财富Android版	g3236386086208350	2.5年	4	23128	66612	7
砸盘的筹码被谁吃了？庄家吗？	2023-04-28 09:41:43	东方财富Android版	k9531346222406978	2年	6	23128	66613	7
怎么没见过这票？	2023-04-28 10:15:07	东方财富Android版	x1207336391689694	1.5年	6	23128	66614	7
4.21号清仓了，算是躲过一遭。但是博天没躲过，亏了几万。一样的，都要挨刀。[6	2023-04-29 18:29:05	东方财富Android版	b9396355724976912	3.6年	4	23129	66615	7
开盘挂多少出，人已经麻啦，希望早点跑出来。	2023-04-29 07:42:33	东方财富Android版	g3236386086208350	2.5年	4	23129	66616	7
没有几天发布退市警示通知厉害的，月初4号停牌，总开盘让散户交易完成涝回点，退市了	2023-04-29 13:32:05	股吧手机网页版	w9187426820611082	1个月	1	23129	66617	7
全新好：2023年一季度净利润亏损23.22万元，上年同期亏损444.39万元	2023-04-29 01:19:00	股吧网页版	s2491125312925070	5年	10	23129	66618	7
全新好：2022年净利润-535.65万，上年盈利3997.06万元	2023-04-29 01:18:04	股吧网页版	s2491125312925070	5年	10	23129	66619	7
上轮ST是2.45，这次如何	2023-04-30 17:04:57	东方财富iPhone版	l3567385509769842	4.3年	6	23130	66620	7
会不会像新海，深南那样，ＳＴ后，直接	2023-04-30 22:59:00	东方财富电脑版	m4219023778510648	9.9年	7	23130	66621	7
拼尽全力，死而无憾[微笑]留待下半生，再生是英雄[赞]	2023-04-30 11:07:59	股吧网页版	m9785094346334420	8.1年	7	23130	66622	7
1.5e的封单不算多，只是财报有问题被st大家疯狂卖，对于这个票来说，实际上的大	2023-05-01 15:10:21	东方财富iPhone版	w8990325930108448	3年	2	23131	66624	7
花几千块钱看戏，我就看它跌到几毛。无所谓就几千当牌九压一把被吃	2023-05-01 17:18:12	东方财富Android版	p2498496769292676	3个月	2	23131	66625	7
今年的立案调查发了没有	2023-05-01 15:42:02	东方财富iPhone版	l3567385509769842	4.3年	6	23131	66626	7
不是至少连续三年亏损才会st吗？这个为什么21年是赚的，就直接*st了？	2023-05-02 22:24:38	东方财富iPhone版	i1689386194581456	2.1年	4	23132	66627	7
祈祷今年利润扣非前后双正吧	2023-05-02 12:47:39	东方财富电脑版	m8701094048279092	9年	5	23132	66628	7
为什么不能叫st好！st全新好难听	2023-05-02 07:31:48	东方财富iPhone版	n7254456637180086	8个月	3	23132	66629	7
明天能出来吗？吐血了	2023-05-03 23:00:43	东方财富iPhone版	b4937385925499266	3年	2	23133	66630	7
破旧烂还什么全新好公司，亏死了	2023-05-03 23:34:24	股吧手机网页版	o9249395585263876	4.1年	4	23133	66631	7
全新好带星带帽后，有利于推进并购重组，将优秀资产装进上市公司，大幅提高上市公司质	2023-05-04 23:05:21	东方财富Android版	i2044416629870670	8个月	2	23134	66633	7
要涨停？淄博风口。游资扫盘。银座股份大股东去年疯狂增持，一阳穿4线？周线和月线堆	2023-05-04 09:52:04	股吧网页版	g7798466777241574	2个月	4	23134	66634	7
有全仓的吗？	2023-05-04 14:09:34	东方财富电脑版	f3230386057695444	2.6年	5	23134	66635	7
7个跌停没商量	2023-05-04 10:01:53	东方财富Android版	t6020326177859634	2.2年	4	23134	66636	7
预测一下退市前价位能跌到多少	2023-05-04 09:50:30	东方财富Android版	u8387316001586646	2.7年	4	23134	66637	7
这是逗比公司，二年前我买入二三天就st，后来赚了点出来，现在又st了[捂脸]	2023-05-04 21:30:54	东方财富Android版	e5422356161051844	2.2年	5	23134	66638	7
这股一半时间都是st	2023-05-04 14:18:44	东方财富Android版	d2107545222370960	5.2年	6	23134	66639	7
哇靠加仓[微笑]1000万	2023-05-04 10:43:49	东方财富Android版	p2498496769292676	3个月	2	23134	66640	7
全新好杀猪盘！请问还有王法吗？还有法律吗？	2023-05-05 23:47:26	股吧网页版	g1287134660427052	7年	2	23135	66641	7
我回来准备等抄底	2023-05-05 14:24:10	东方财富iPhone版	z6514336146553096	2.3年	5	23135	66642	7
没有买盘，根本卖不出去，死扛吧	2023-05-05 09:58:10	东方财富Android版	g3236386086208350	2.5年	4	23135	66643	7
2021年新增的贸易业务，2023年可以合并进主营业务收入了，今年不出意外的话营	2023-05-05 11:10:32	东方财富iPhone版	o3859246716190554	5个月	2	23135	66644	7
*ST全新股价创近1年半新低	2023-05-05 15:40:19	股吧网页版	i2635125312925094	5年	8	23135	66645	7
不错，还有有点成交量，今天成交量突破60玩意，难得	2023-05-05 14:08:56	东方财富Android版	u8387316001586646	2.7年	4	23135	66646	7
预计3个板后开	2023-05-05 13:28:48	东方财富Android版	m5294094248292158	8.4年	4	23135	66647	7
5.18元（没有业绩支撑的题材股，都是未知的泡沫浮云。）	2023-05-05 11:32:23	东方财富Android版	yk500	10.5年	9	23135	66648	7
参考st西域5块钱以上止跌	2023-05-05 07:36:43	东方财富Android版	g7312336476786320	1.2年	1	23135	66649	7
加	2023-05-07 01:50:28	东方财富Android版	m9594094454965774	7.7年	2	23137	66650	7
竞猜多少钱止跌	2023-05-08 13:05:47	东方财富Android版	b2559355511527202	4.3年	4	23138	66651	7
这股票是要退市吗，有明白的出来说说	2023-05-08 10:11:49	股吧手机网页版	l2366406715053080	5个月	2	23138	66652	7
明天跌停可以大胆抄底了	2023-05-08 14:31:54	东方财富Android版	p5625266140181464	2.3年	4	23138	66653	7
公司董事、独立董事都辞职了，后面应该有所动作了吧	2023-05-08 22:00:32	东方财富Android版	f4548345985000100	2.8年	2	23138	66654	7
有人在吸货	2023-05-08 21:38:59	东方财富Android版	n6538014175472118	8.6年	5	23138	66655	7
我不，服！为什么？	2023-05-08 20:04:07	东方财富Android版	e8509114645871248	7.1年	5	23138	66656	7
*ST全新股价连续2日创近1年半新低	2023-05-08 15:41:57	股吧网页版	i2635125312925094	5年	8	23138	66657	7
这代码，就容易退市……	2023-05-08 16:02:28	东方财富Android版	SHEV	14.5年	8	23138	66658	7
成交80多万块，谁会这时候下手去买？	2023-05-08 14:22:32	东方财富iPhone版	t8489625188463754	5.4年	2	23138	66659	7
别急，跌到22号，开完股东大会，主力会全仓买入	2023-05-08 13:23:05	东方财富Android版	d1471446803336582	1个月	2	23138	66660	7
今天总共成交3万多股，18万，可怜，连逃机会没有，这股2元左右散户可以大举买入，	2023-05-08 12:46:30	股吧手机网页版	w9187426820611082	1个月	1	23138	66661	7
这股票是要退市吗	2023-05-08 10:11:12	股吧手机网页版	l2366406715053080	5个月	2	23138	66662	7
哎，要破产了，保不住了	2023-05-09 20:34:58	东方财富Android版	d1471446803336582	1个月	2	23139	66663	7
又戴帽了[捂脸]	2023-05-09 17:09:47	东方财富Android版	h2287305960309730	2.9年	6	23139	66664	7
还是逃不过规则。	2023-05-09 16:54:12	股吧手机网页版	i8769085290771508	5年	4	23139	66665	7
*ST全新5日连续跌停 买卖前五净卖出61万元	2023-05-09 16:22:12	股吧网页版	i2635125312925094	5年	8	23139	66666	7
哎，没用的，不跌破2元没人接手了，散户认栽吧	2023-05-09 06:55:36	东方财富Android版	d1471446803336582	1个月	2	23139	66668	7
还真有来抄底	2023-05-09 10:23:22	东方财富Android版	w2060316299821566	1.8年	3	23139	66669	7
明后天开板！	2023-05-10 21:12:47	东方财富iPhone版	z6514336146553096	2.3年	5	23140	66671	7
全新好啥时候开板，啥时候开板就全仓买进200万	2023-05-10 16:10:13	东方财富Android版	d1471446803336582	1个月	2	23140	66672	7
刚摘没多久，现在这冒又戴上了……2块等你买个几万玩玩，要求不高像前年给我赚1倍就	2023-05-10 21:37:54	股吧手机网页版	p8394366232269332	2年	2	23140	66673	7
搞得散户也卖不掉，真垃圾	2023-05-10 18:19:18	东方财富Android版	d1471446803336582	1个月	2	23140	66674	7
为什么锁仓，为什么不让散户卖掉，直接卖空不就行了吗，全新卖空	2023-05-10 18:18:24	东方财富Android版	d1471446803336582	1个月	2	23140	66675	7
即决高下，也分生死	2023-05-10 10:53:44	东方财富Android版	g3236386086208350	2.5年	4	23140	66676	7
5月10日52只股票跌停 附跌停名单	2023-05-10 16:45:59	股吧网页版	d2794125312925112	5年	9	23140	66677	7
说实话我想来翘板当解放君了	2023-05-10 16:34:17	东方财富Android版	m8142376184024588	2.2年	4	23140	66678	7
*ST全新股价连续4日创近1年半新低	2023-05-10 15:42:55	股吧网页版	i2635125312925094	5年	8	23140	66679	7
看到这垃圾跌停，今天亏3个点也算平衡了，哈哈[成交][想一下][呲牙]	2023-05-10 15:10:16	东方财富iPhone版	v9751645265328168	5.1年	7	23140	66680	7
没有低位，只有再低	2023-05-10 10:34:02	东方财富Android版	q1186356230444390	2年	2	23140	66681	7
娘地隔壁	2023-05-10 06:48:50	东方财富Android版	p9175145413194582	4.6年	3	23140	66682	7
没散户了？	2023-05-11 23:04:04	东方财富Android版	u8622326338835940	1.7年	4	23141	66683	7
又是博恒在变魔术？	2023-05-11 15:21:32	股吧网页版	t7062074907491466	6.3年	6	23141	66684	7
炼卫飞还没结案，这是个雷，要出问题赔的钱不少的	2023-05-11 09:50:57	东方财富iPhone版	w8990325930108448	3年	2	23141	66685	7
*ST全新股价连续5日创近1年半新低	2023-05-11 15:38:02	股吧网页版	i2635125312925094	5年	8	23141	66686	7
这不来个地天吸引下人气[微笑][俏皮]	2023-05-11 14:00:03	东方财富Android版	g1361156357776206	1.6年	3	23141	66687	7
好腹黑。。。竞价不挂卖。我撬板打开了你来劲了，又封死了	2023-05-11 12:34:54	东方财富Android版	c9854565192707652	5.3年	7	23141	66688	7
明天封板涨停，主力在吸筹，大家快快加仓吧，风浪越大鱼越贵	2023-05-11 13:29:53	东方财富Android版	d1471446803336582	1个月	2	23141	66689	7
不开板就等着退市了	2023-05-11 13:26:31	东方财富Android版	d1471446803336582	1个月	2	23141	66690	7
今天还得封跌停，几个私募资金翘板了，等着小散割肉抛廉价筹码呢，尽然没人割肉。你们	2023-05-11 09:51:33	东方财富Android版	m6886094377214932	8年	7	23141	66691	7
这个形态，开的太早了[滴汗]	2023-05-11 12:24:24	东方财富Android版	q9929346333371096	1.7年	6	23141	66692	7
今天开板，低开高走涨停收盘	2023-05-11 09:26:28	东方财富Android版	m1461023756912286	10年	6	23141	66693	7
昨天就说今天开板！	2023-05-11 09:34:45	东方财富iPhone版	z6514336146553096	2.3年	5	23141	66694	7
怎么还不开板，明天能开吗，大神	2023-05-11 09:29:18	东方财富Android版	d1471446803336582	1个月	2	23141	66695	7
真金白银投入被别人摆，那就得争权夺位，让那些莽夫站一边看去，做起来打他们脸，就是	2023-05-11 09:04:54	东方财富iPhone版	w8990325930108448	3年	2	23141	66696	7
机构狂甩货，果断割肉	2023-05-12 16:54:24	东方财富Android版	f6709306033908382	2.6年	4	23142	66698	7
哎我买的，ST奇信，ST未来，多次廷期，多次重组进行中，到退市前都还只部份回复。	2023-05-12 21:48:41	东方财富Android版	v6251416770622824	3个月	5	23142	66699	7
已经废了，不要报任何幻想	2023-05-12 19:27:48	东方财富iPhone版	q1609385546410502	4.2年	6	23142	66700	7
文盲都不看我发的？	2023-05-12 15:09:25	东方财富iPhone版	z6514336146553096	2.3年	5	23142	66701	7
跌停板来一个几十手	2023-05-12 14:05:30	股吧网页版	m3640094400600148	7.9年	3	23142	66702	7
最近没有龙虎榜了吗	2023-05-12 13:56:00	东方财富电脑版	o7186315807943446	3.4年	3	23142	66703	7
再跌板就完蛋了	2023-05-12 13:40:06	东方财富Android版	t8489625188463754	5.4年	2	23142	66704	7
昨天跌停进的，今天高点出了，情况不容乐观，主力也想少亏点，所以翘板，上板搞热度出	2023-05-12 12:38:11	东方财富Android版	g1361156357776206	1.6年	3	23142	66705	7
不急着进厂啊，这些私募是上次同一批私募，底依然是2.45元，近两元的空间，就是为	2023-05-12 11:29:33	东方财富Android版	m6886094377214932	8年	7	23142	66706	7
为了筹码，十八班武艺样样精通啊，看着吧今天的震荡幅度会打到25个点的。上去下来，	2023-05-12 09:58:35	东方财富Android版	m6886094377214932	8年	7	23142	66707	7
还得回到3元下方。	2023-05-12 08:29:54	股吧网页版	m4224094471355132	7.7年	6	23142	66708	7
现在不卖，那就等3块多才能卖了	2023-05-12 14:06:40	东方财富Android版	p3168346425820546	1.4年	3	23142	66709	7
主力在逃	2023-05-12 09:39:33	东方财富Android版	p3168346425820546	1.4年	3	23142	66710	7
中报转正能摘帽吗？	2023-05-14 22:49:57	东方财富Android版	i3470305935651742	2.9年	3	23144	66712	7
全新好非公司原因而股价暴跌，是因为投资人在海外银行资产破产利益受损形成的蝴蝶效应	2023-05-15 16:20:01	东方财富Android版	m1034094167480562	8.6年	9	23145	66714	7
*ST全新股价连续7日创近1年半新低	2023-05-15 15:45:55	股吧网页版	i2635125312925094	5年	8	23145	66716	7
虽然不会连续跌停板，但是趋势还是向下，离底部还有一段距离	2023-05-15 12:47:05	东方财富Android版	p3168346425820546	1.4年	3	23145	66717	7
还有的跌	2023-05-16 11:21:52	东方财富Android版	m6603094268238748	8.3年	3	23146	66718	7
此时不抄底更待何时	2023-05-16 09:45:27	东方财富iPhone版	m5707094926685398	6.2年	0	23146	66719	7
22号股东大会前应该会涨[赞]	2023-05-17 13:58:57	东方财富Android版	p3168346425820546	1.4年	3	23147	66723	7
封板了	2023-05-18 09:54:40	东方财富Android版	c2661085341548590	4.9年	4	23148	66724	7
先看到6元	2023-05-18 10:07:29	东方财富iPhone版	t1270265586780024	4.1年	3	23148	66725	7
退了啦别占着全新的茅坑	2023-05-19 21:50:05	东方财富Android版	w6938034869774428	6.4年	5	23149	66726	7
没有人气，还有一个下跌。	2023-05-19 10:59:13	东方财富Android版	l8168025428931736	4.6年	5	23149	66727	7
能咸鱼翻身吗？	2023-05-19 10:34:20	东方财富Android版	k1724385739145596	3.6年	4	23149	66728	7
这个股不是刚撤销ST没多久吗？怎么又重新ST，真的是无语	2023-05-20 20:06:20	东方财富Android版	m1039335938451678	2.9年	3	23150	66729	7
戴帽前找王可欣签一致协议，散布“实控变更”的假消息配合出货，到后头连王可欣是谁都	2023-05-21 18:50:14	东方财富iPhone版	o3859246716190554	5个月	2	23151	66730	7
庄股说不得，说了就删帖？	2023-05-21 18:04:42	东方财富iPhone版	o3859246716190554	5个月	2	23151	66731	7
真奇怪，博恒和共青城不是一起的吗，选举董事，博恒却投了反对票	2023-05-22 22:07:24	东方财富Android版	c2661085341548590	4.9年	4	23152	66732	7
现在玩这么刺激吗，不是涨停就是跌停	2023-05-22 15:03:53	东方财富Android版	g3236386086208350	2.5年	4	23152	66733	7
希望大利好，大涨呢	2023-05-22 12:14:38	东方财富Android版	u8948496654237728	7个月	1	23152	66734	7
此股如果还是股东内斗，那绝对是24年退市股的种子选手	2023-05-23 14:16:38	东方财富iPhone版	u1593114748001510	6.8年	5	23153	66735	7
都看衰，看来要涨	2023-05-23 17:06:03	东方财富Android版	e1789466818739834	1个月	1	23153	66736	7
真的是一言难尽[滴汗]能跌成这样子	2023-05-23 15:51:21	东方财富iPhone版	s1881446624254402	8个月	0	23153	66737	7
是不是要完蛋了？感觉很不和谐啊！	2023-05-23 15:19:08	东方财富Android版	m7708094342532874	8.1年	3	23153	66738	7
现在的散户不是以前的散户，又当又立，又想要控制权又想全身而退？世上哪有那么多两全	2023-05-23 13:55:30	东方财富iPhone版	w2091426835998482	19天	1	23153	66739	7
散户再进那真的出不来了，这点成交量是做出来的，没有利好从跌停拉红，笑死人…他有啥	2023-05-23 14:46:39	东方财富iPhone版	w8990325930108448	3年	2	23153	66740	7
无论什么原因，第一大股东失联，如果第二大股东不愿改变现状，不愿放控制权，就等着退	2023-05-23 10:16:18	东方财富iPhone版	w2091426835998482	19天	1	23153	66741	7
基本定格，最后让资方逃了1800万，操盘可真惨，董事会肯定是碰到“一致”之前有话	2023-05-23 09:56:40	东方财富iPhone版	w8990325930108448	3年	2	23153	66742	7
收市必跌停	2023-05-23 09:57:23	东方财富Android版	p3168346425820546	1.4年	3	23153	66744	7
都这时候还在内斗	2023-05-23 06:01:37	东方财富iPhone版	m9191094134166754	8.7年	7	23153	66745	7
这两年在各大房地产股看来看去，没想到一个全新好竟然活到了现在。[笑哭]以目前房地	2023-05-24 14:51:55	东方财富Android版	g2877156178968834	2.2年	5	23154	66746	7
送花和掌声	2023-05-24 14:04:53	东方财富Android版	u8948496654237728	7个月	1	23154	66747	7
小孩儿过家家	2023-05-24 08:44:21	东方财富Android版	i4158346188771040	2.1年	2	23154	66748	7
走向退市	2023-05-25 10:52:39	东方财富Android版	n6241064806827008	6.6年	6	23155	66749	7
今天有点硬啊，st都跌成狗了	2023-05-25 15:07:32	东方财富Android版	e6547345729373894	3.6年	6	23155	66750	7
给了机会就把握住	2023-05-26 09:49:52	东方财富iPhone版	m1105094181913102	8.6年	3	23156	66751	7
小散已经开始恐慌了。	2023-05-26 13:13:17	东方财富Android版	l8168025428931736	4.6年	5	23156	66752	7
左手倒右手	2023-05-26 13:30:05	东方财富iPhone版	c8442316118263512	2.4年	1	23156	66753	7
这个位置股价还是太高了，基本没人参与。退市边缘的股票要到2元左右才是进场博弈的点	2023-05-26 14:35:18	东方财富Android版	m6886094377214932	8年	7	23156	66754	7
[献花]	2023-05-26 17:17:55	东方财富Android版	wxy111111	10.9年	1	23156	66755	7
[赞]	2023-05-26 10:06:14	东方财富Android版	wxy111111	10.9年	1	23156	66756	7
